# Supplementary material
Source: PubMed Central journal article supplement (PMC4143023)

# chr6.tRNA169-iMetCAT

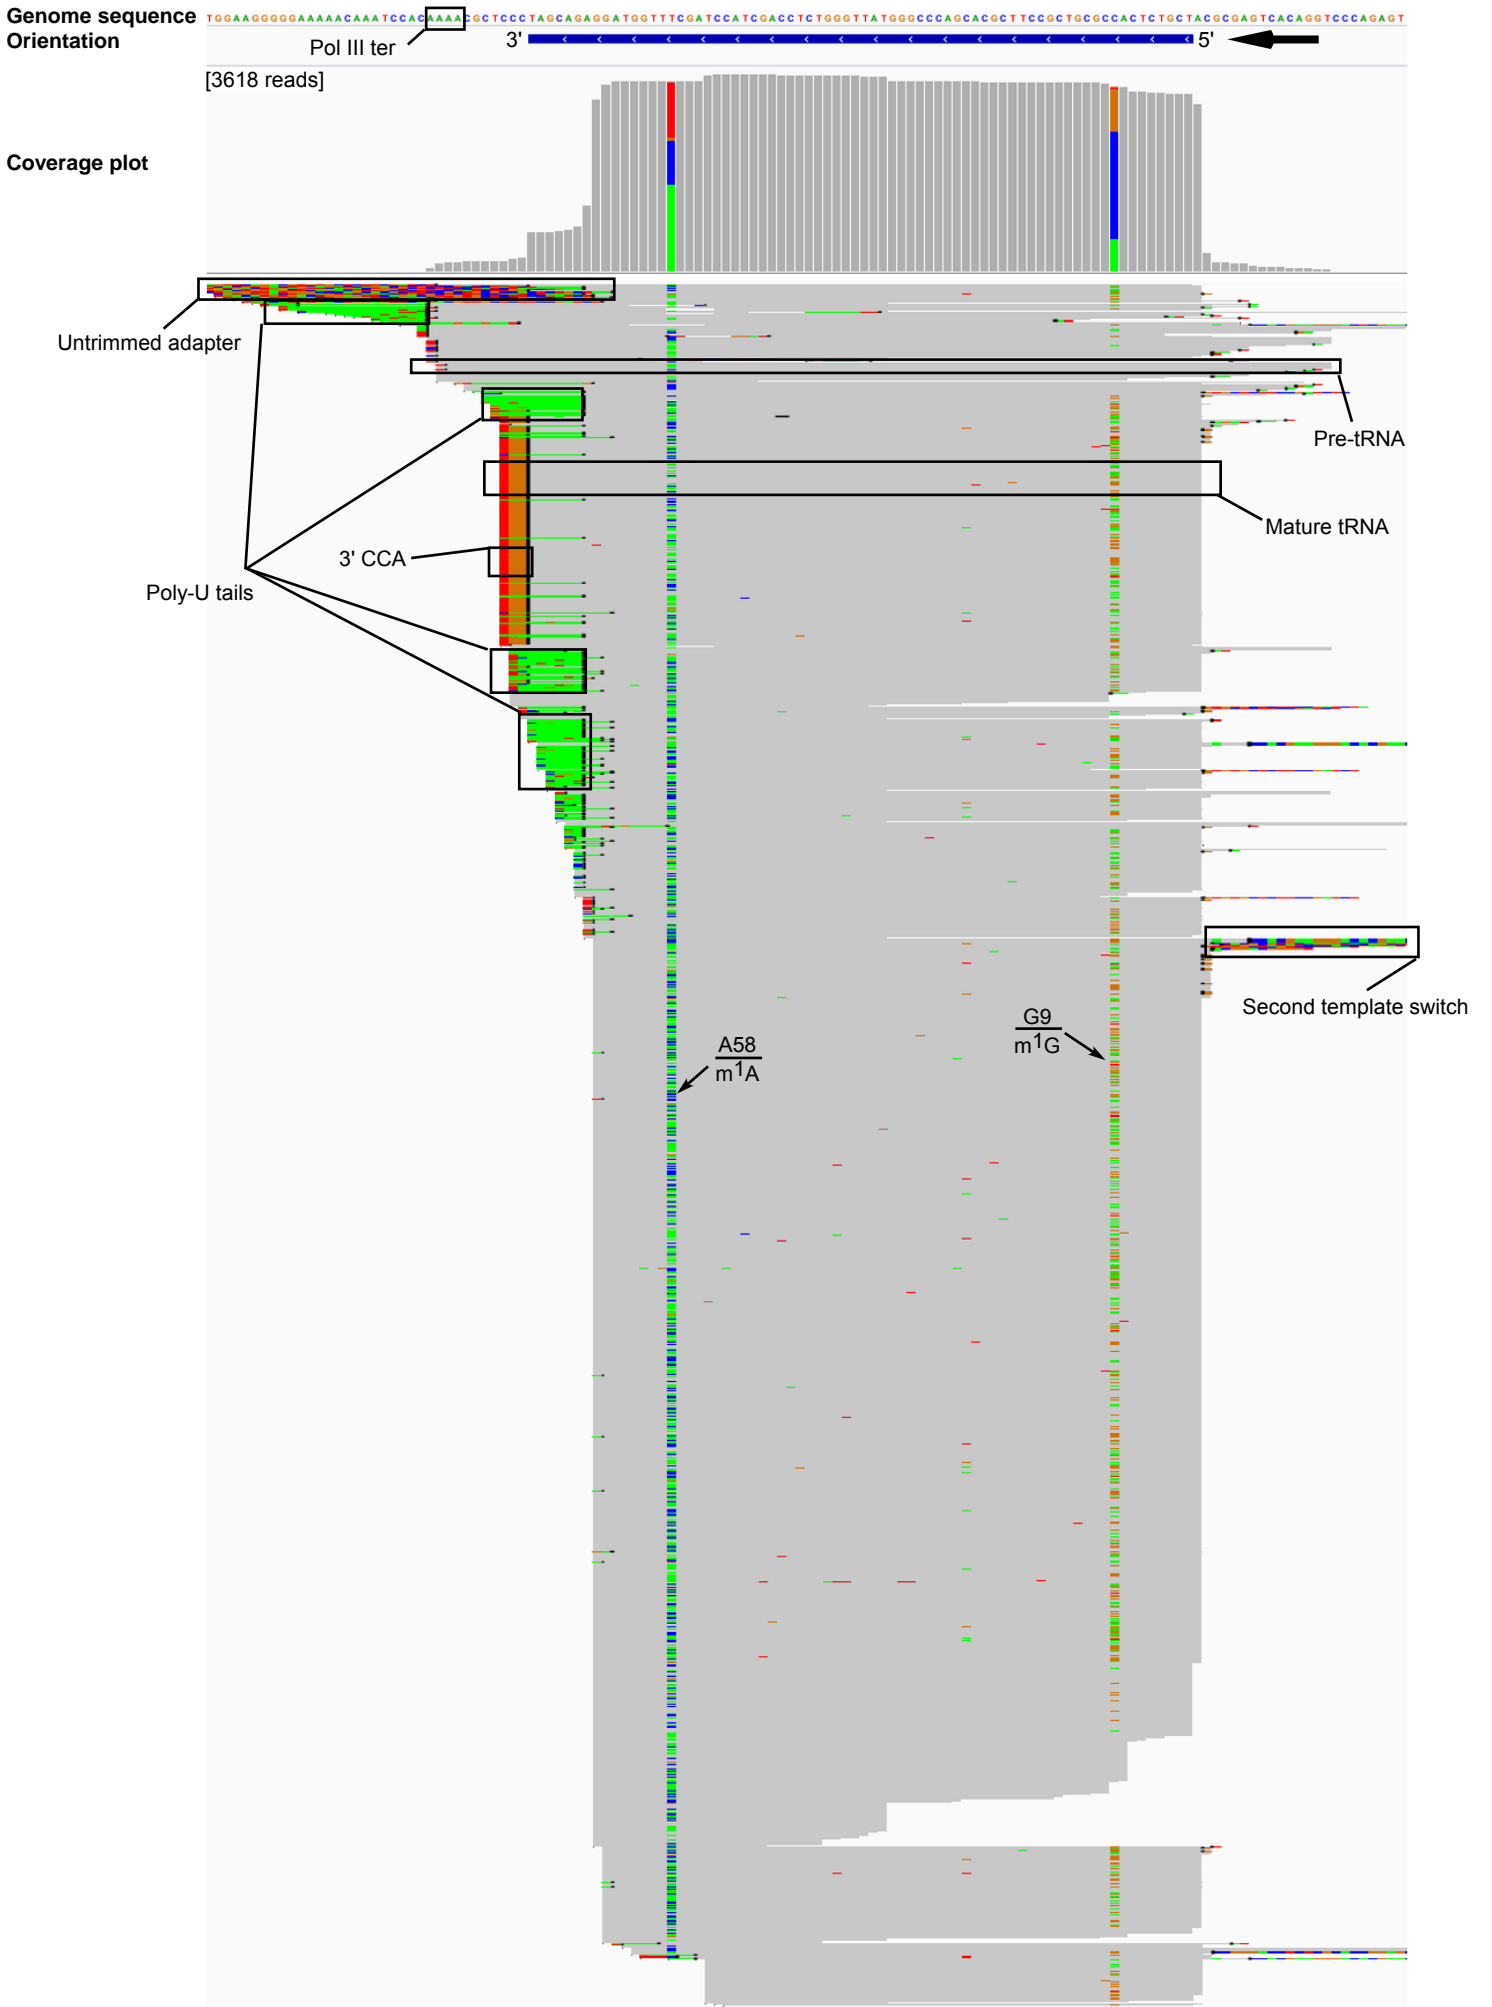

# chr12.tRNA4-AspGTC

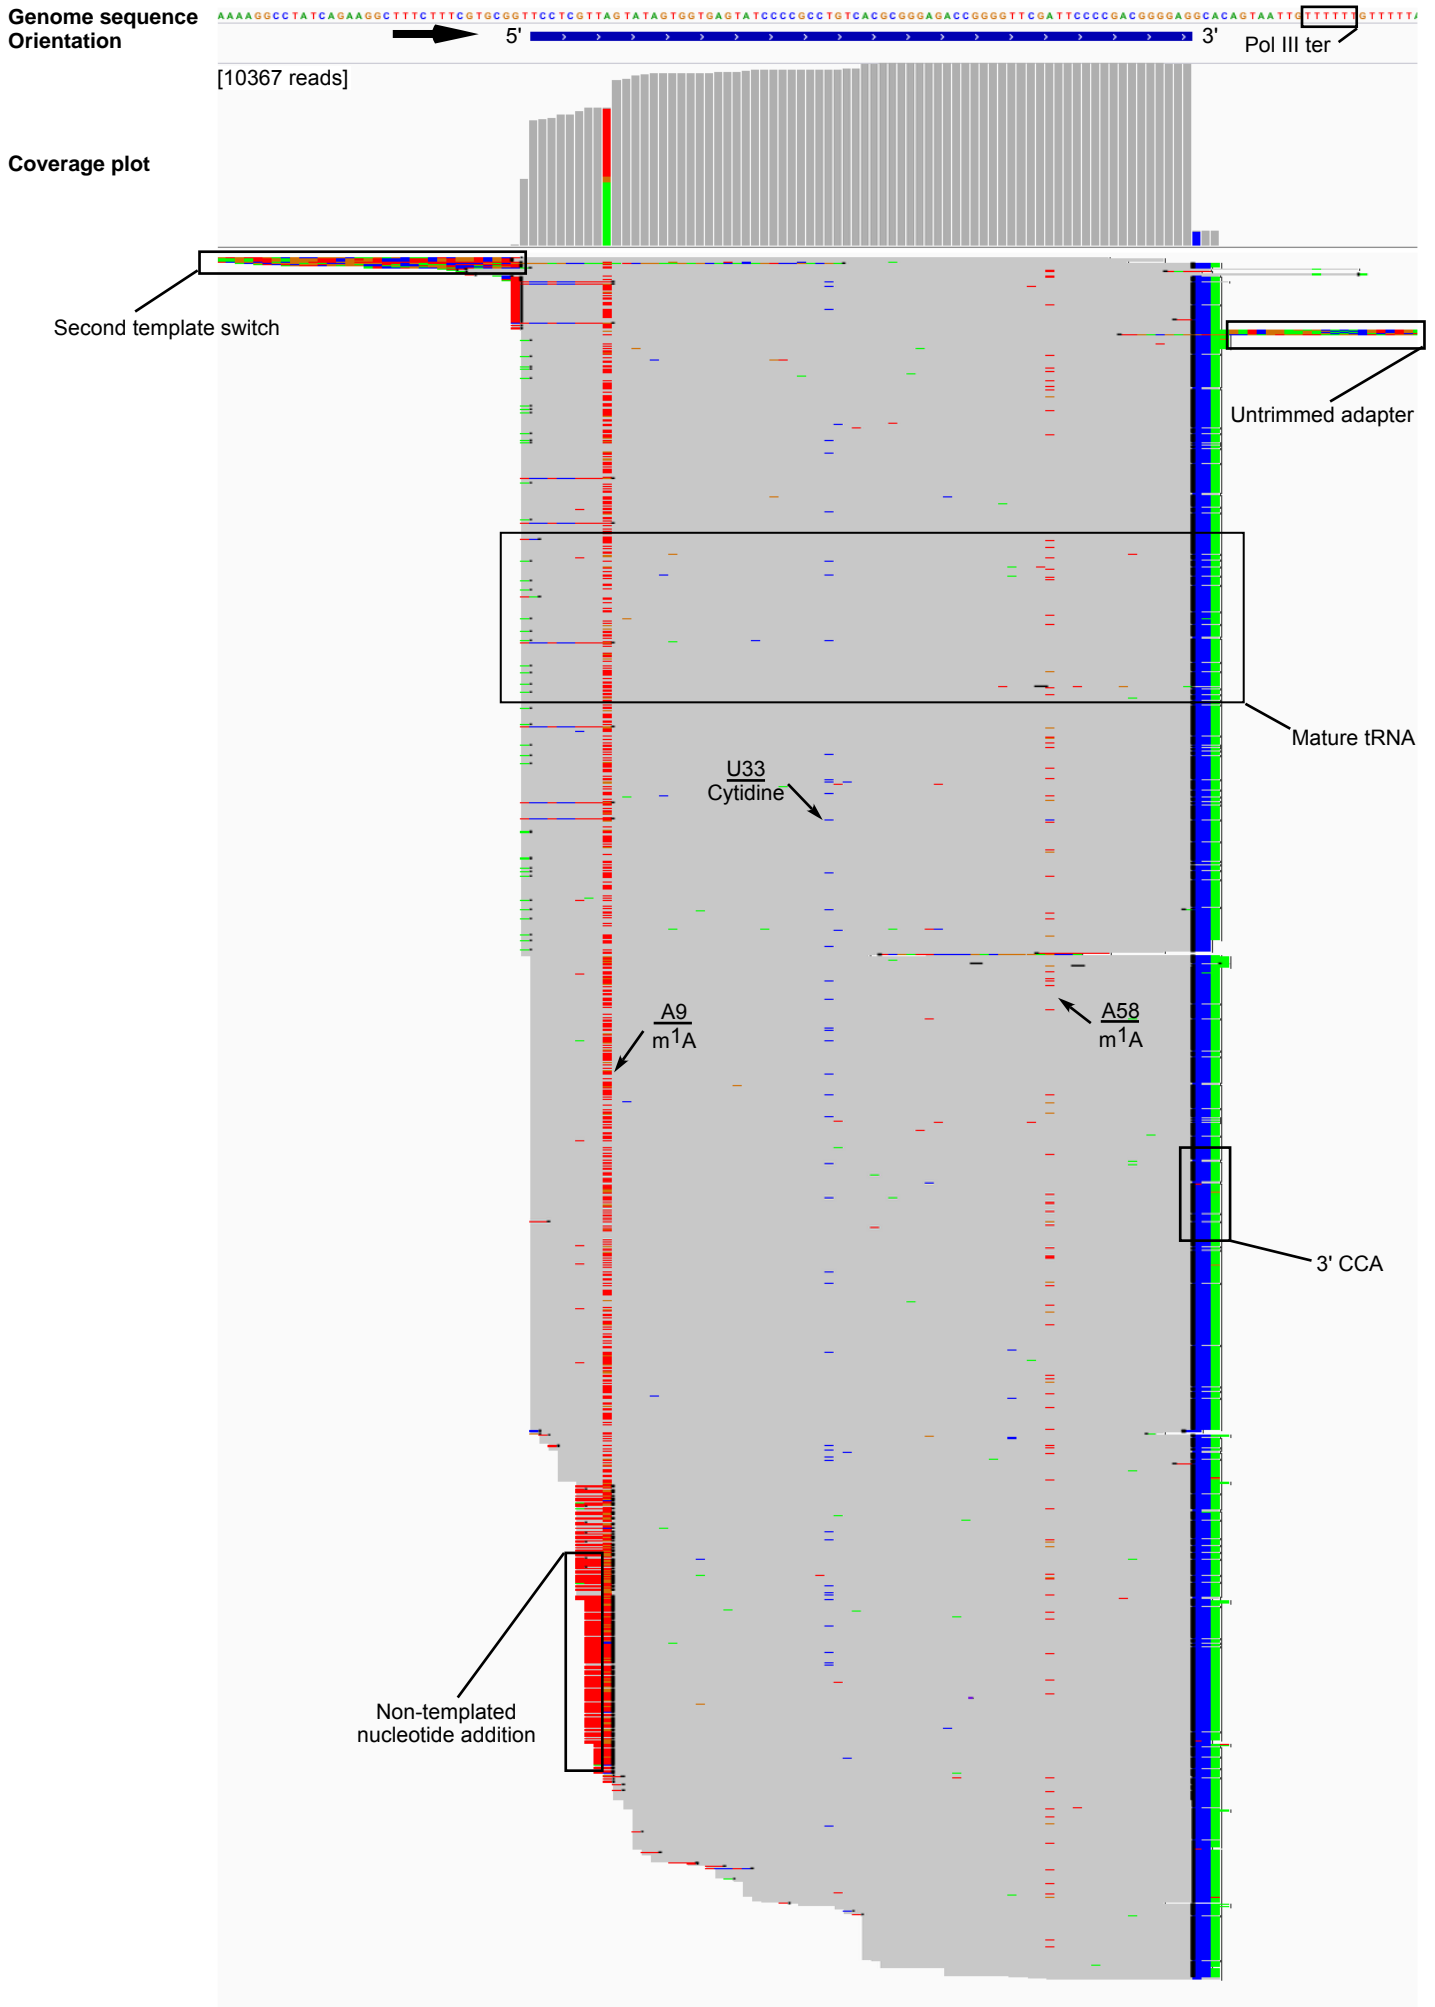

# chr1.tRNA21-HisGTG

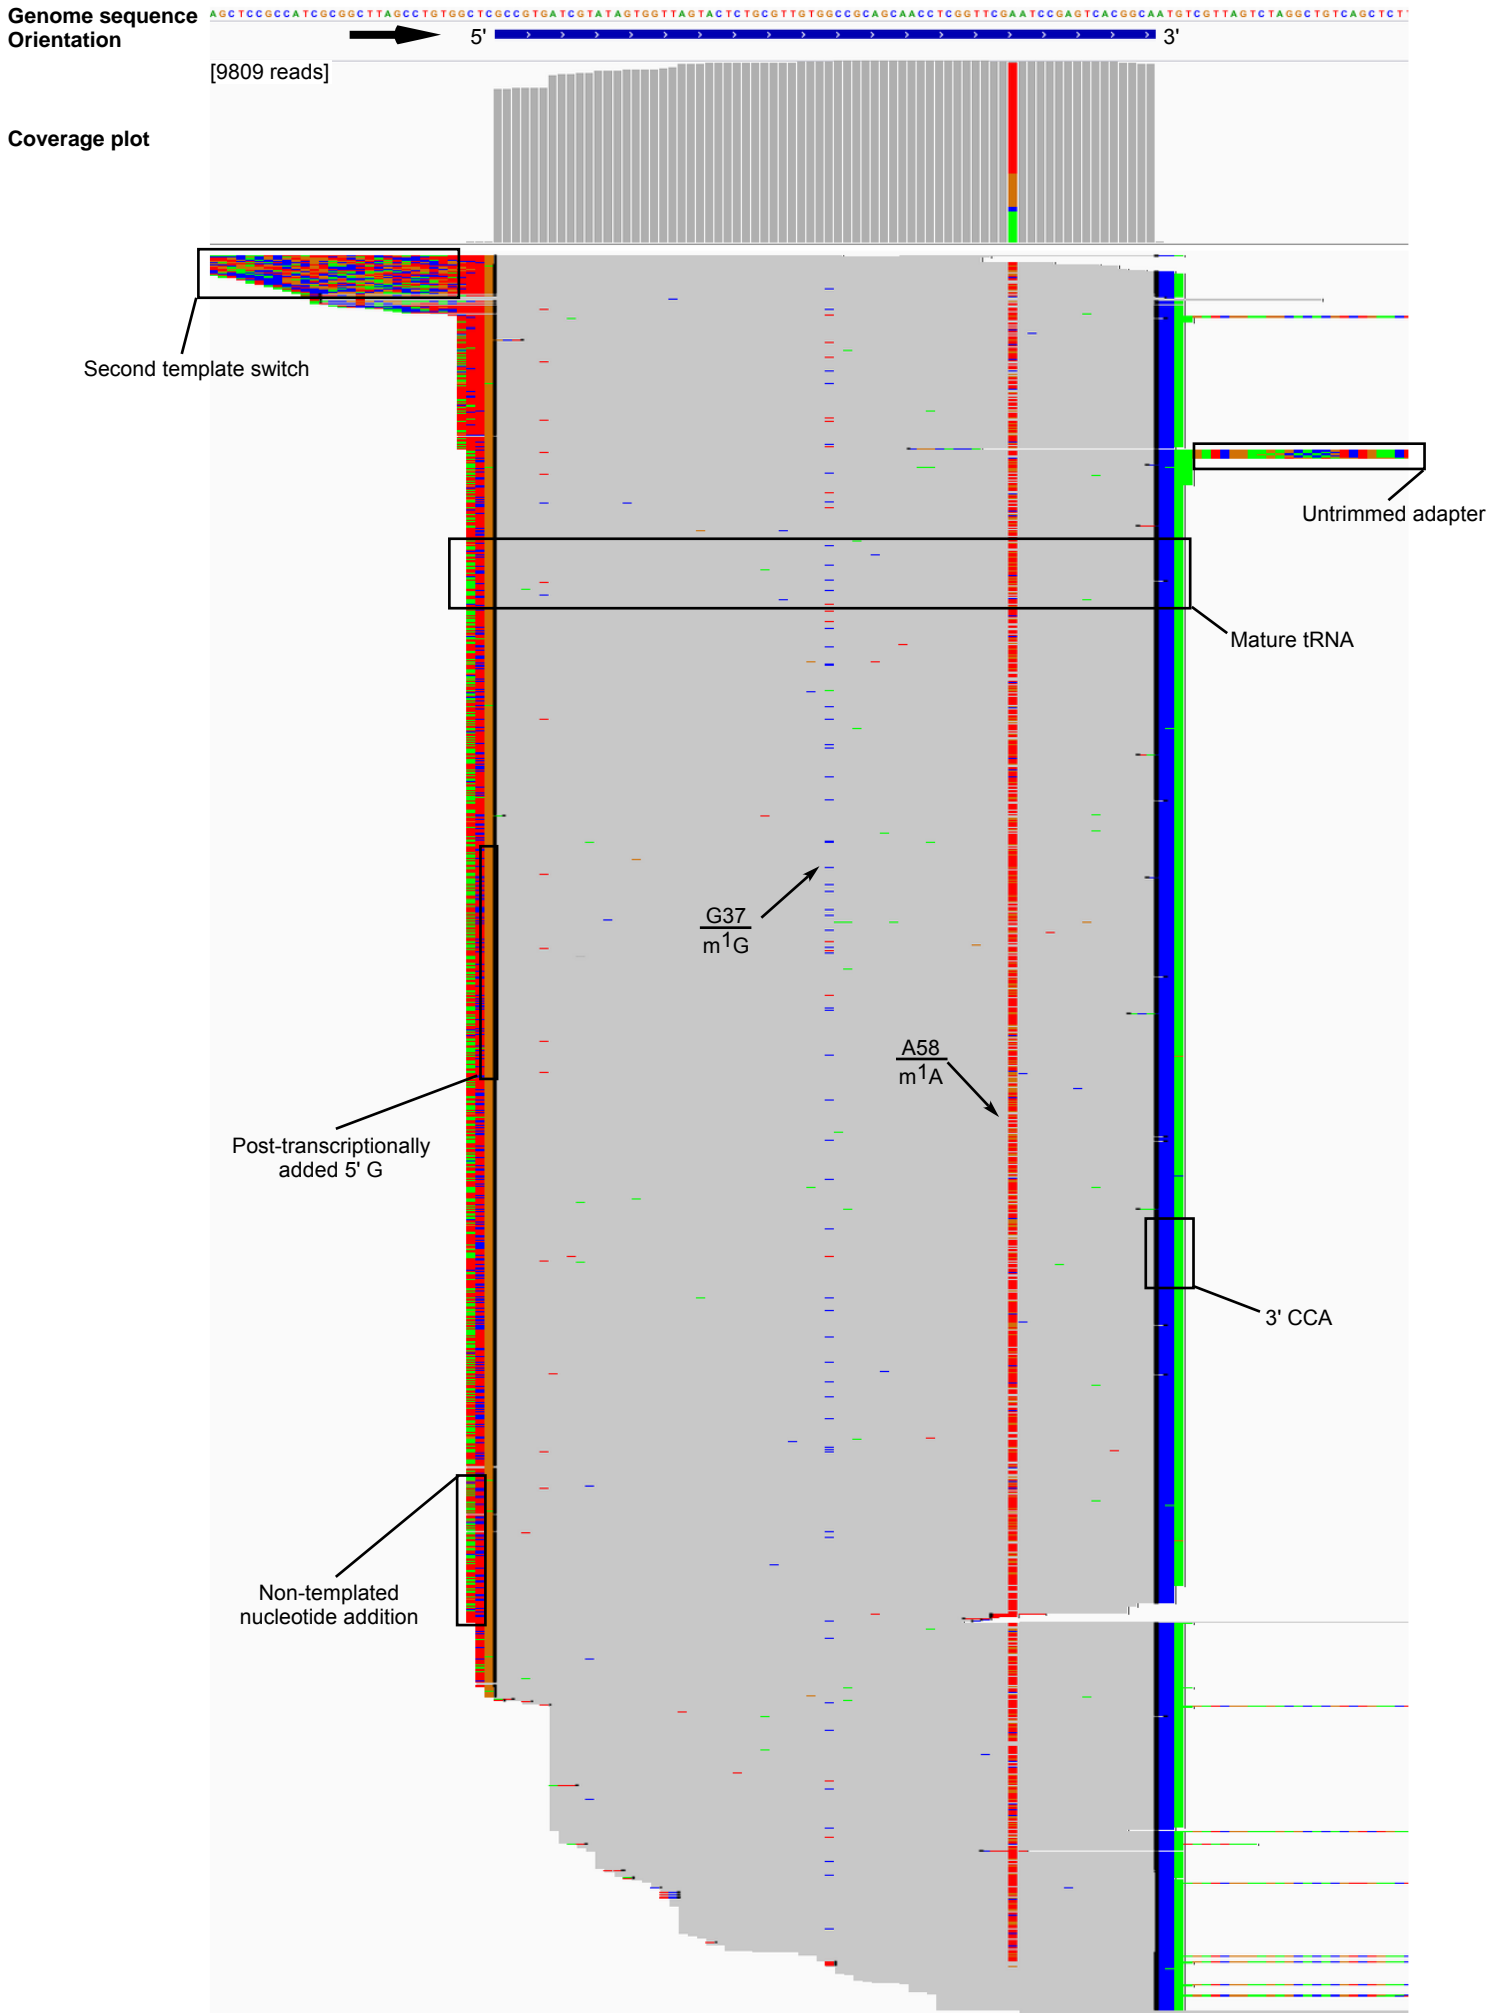

# chr12.tRNA8-AlaTGC

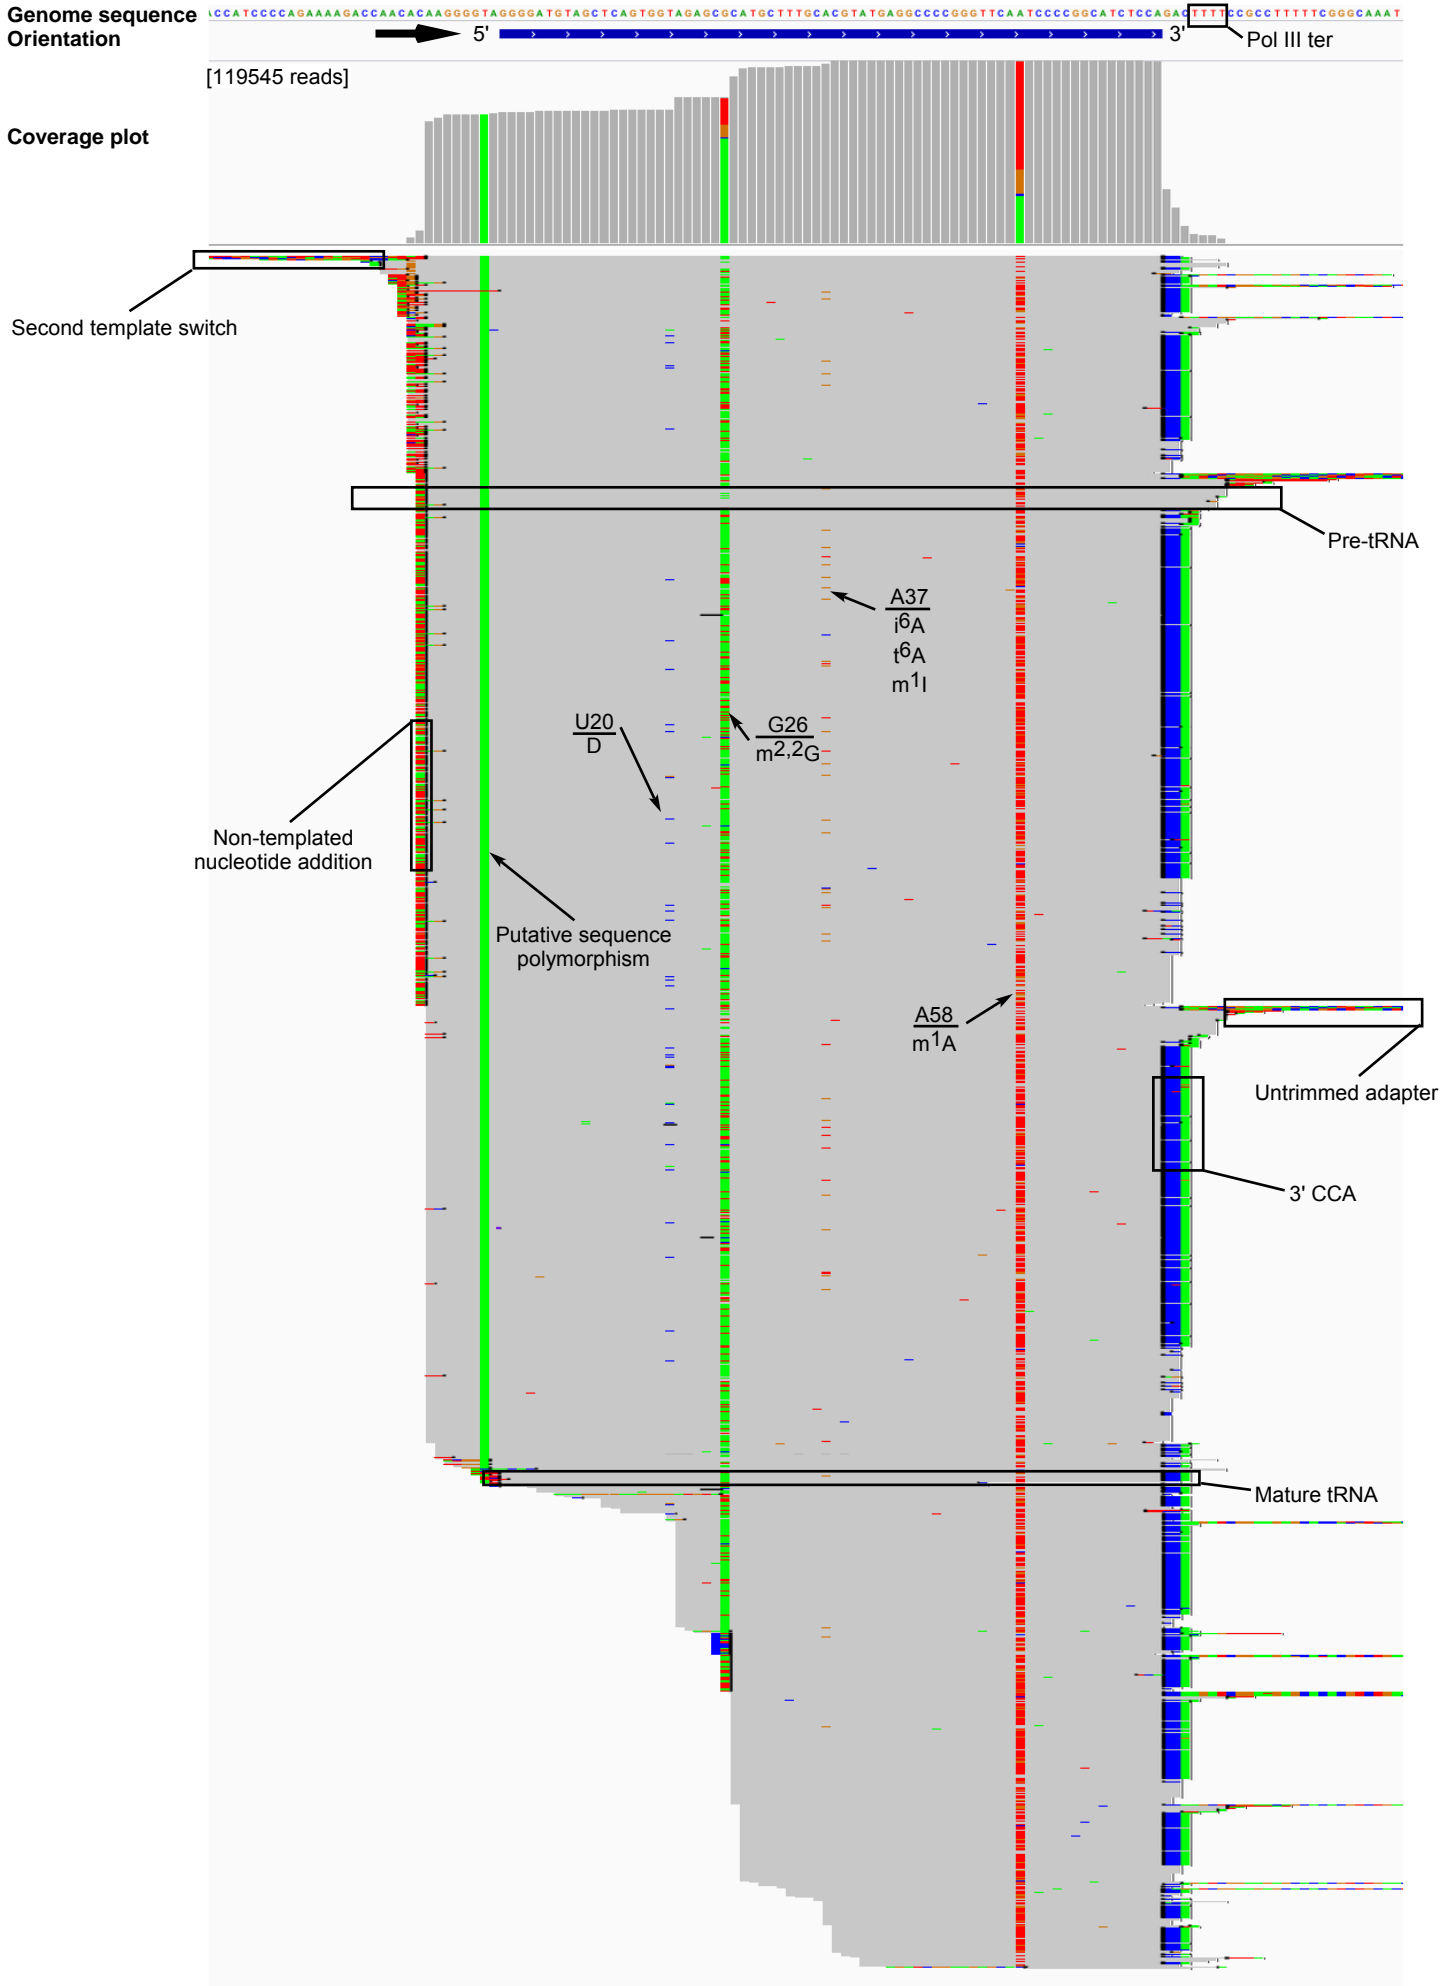

# chr6.tRNA132-ValAAC

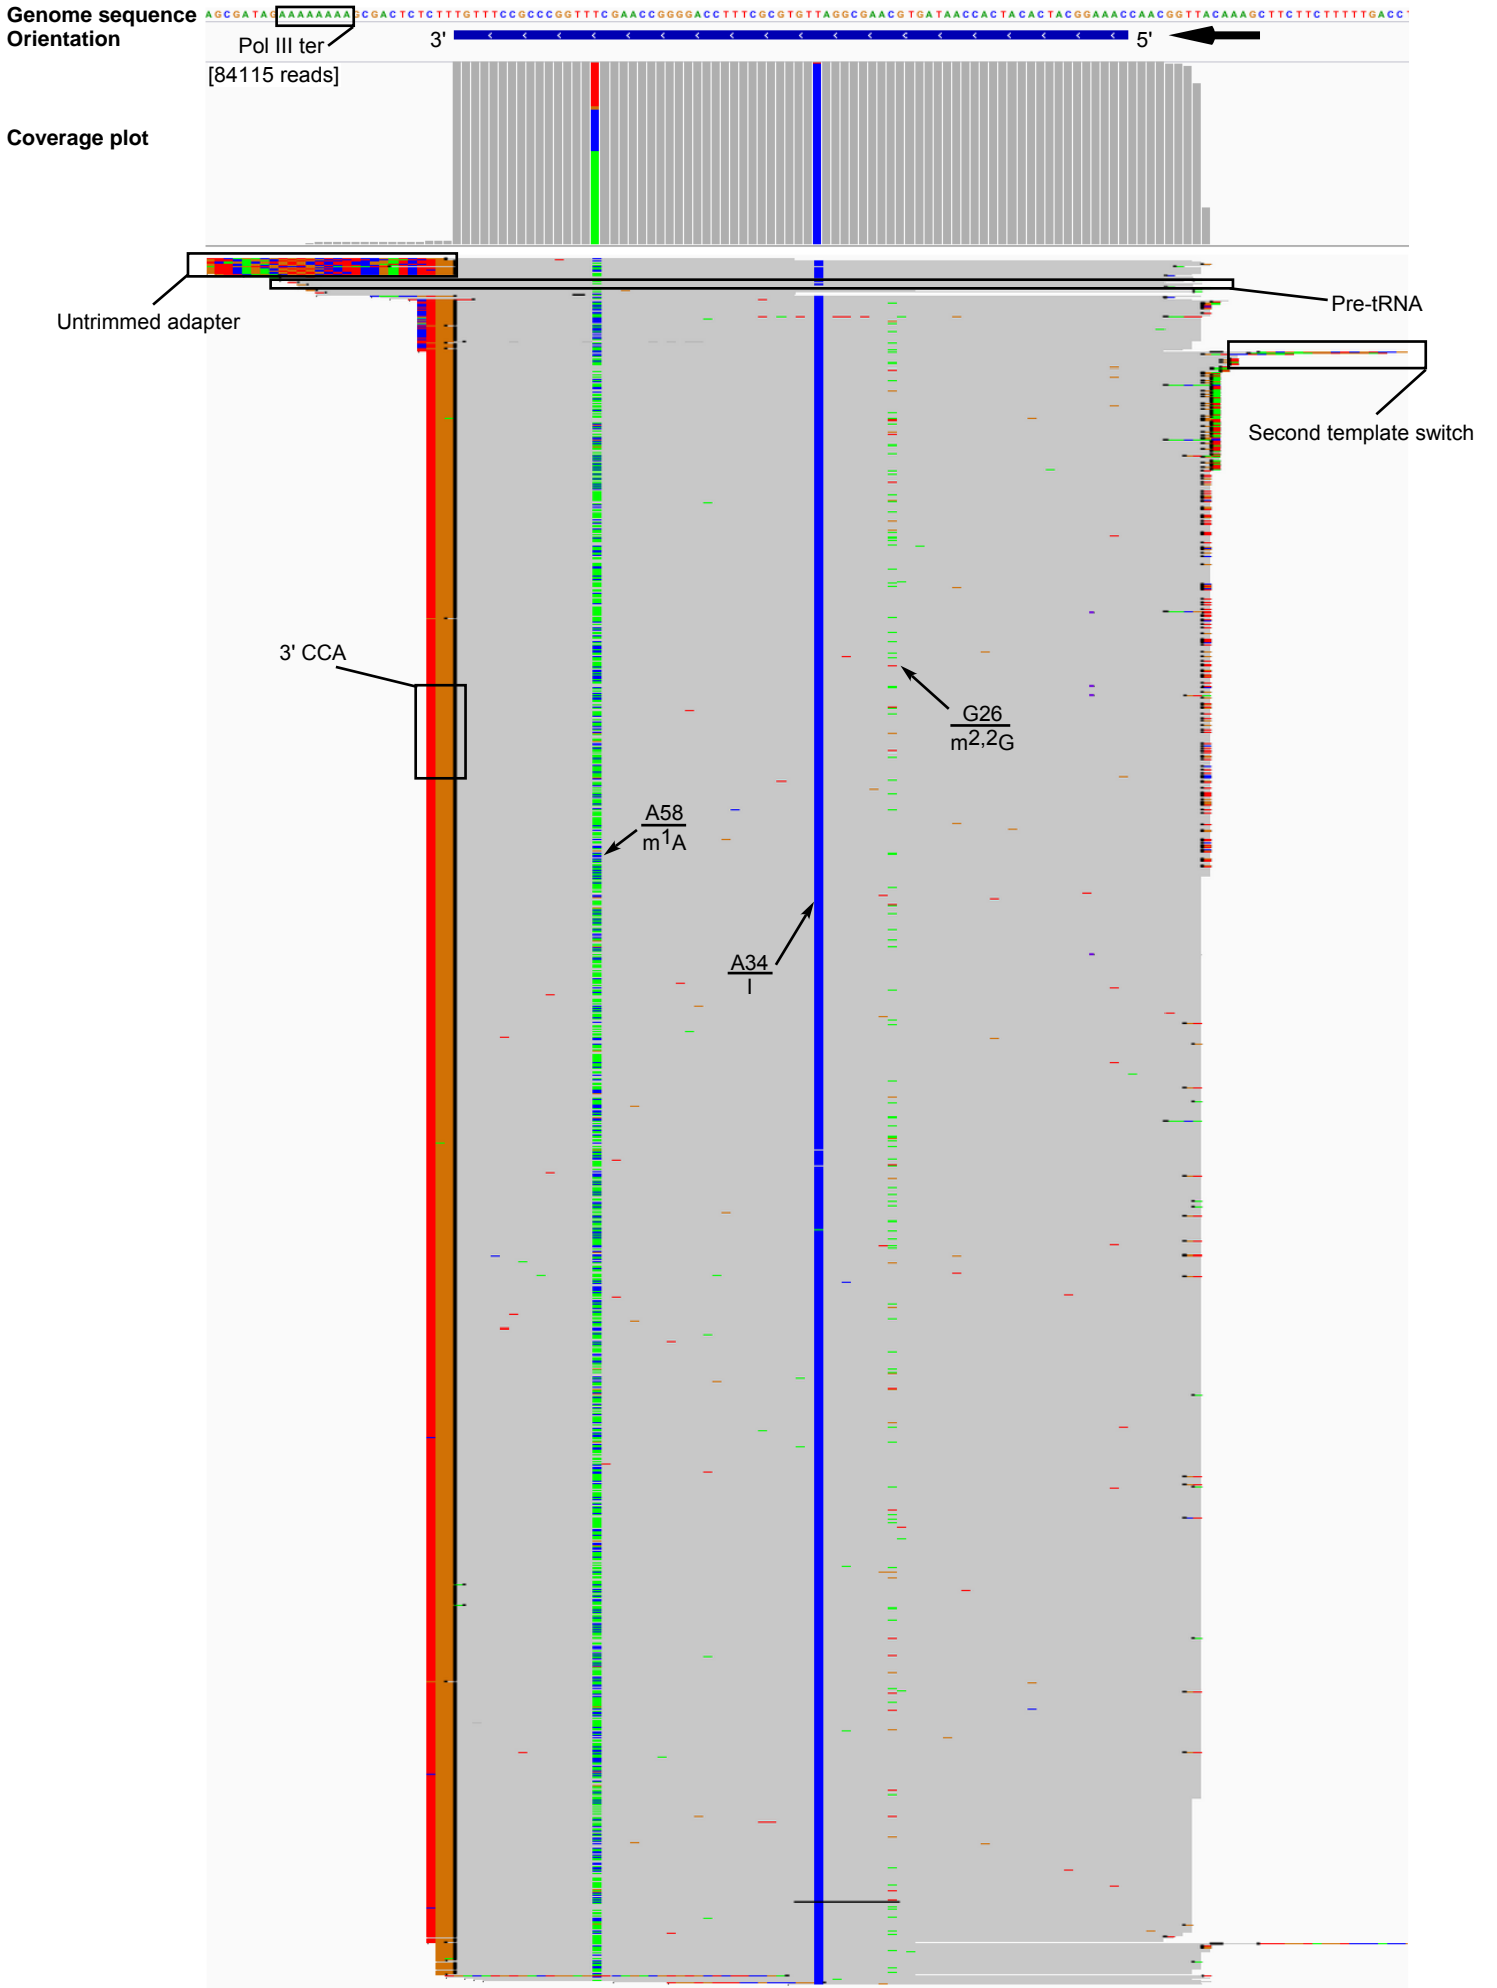

# chr11.tRNA3-ArgTCT ( vs gene )

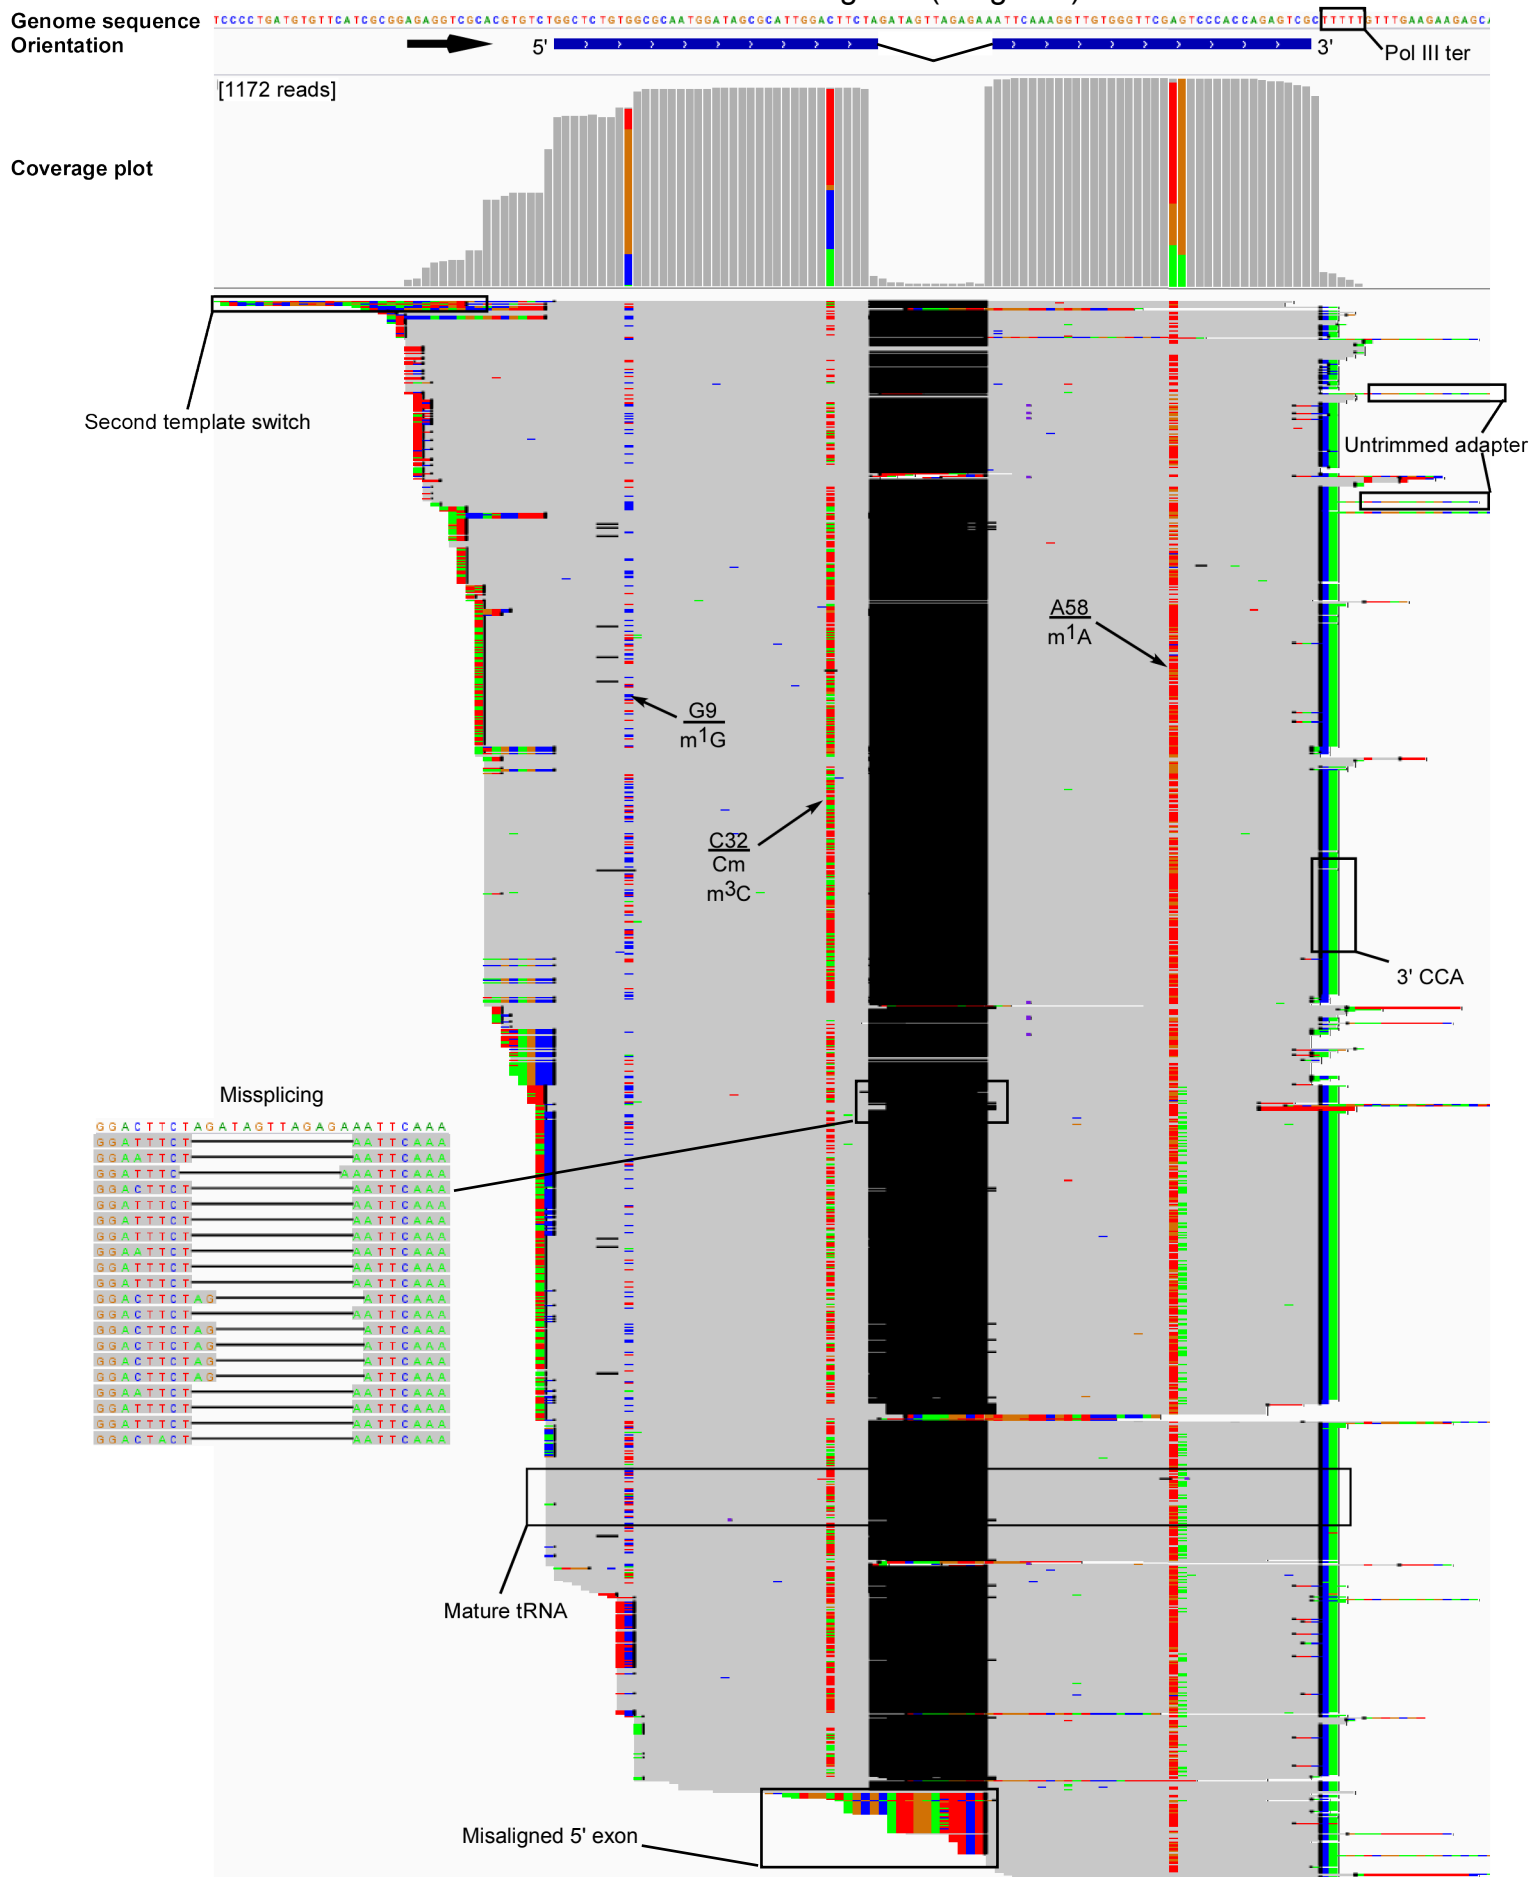

# chr11.tRNA3-ArgTCT ( vs spliced tRNA)

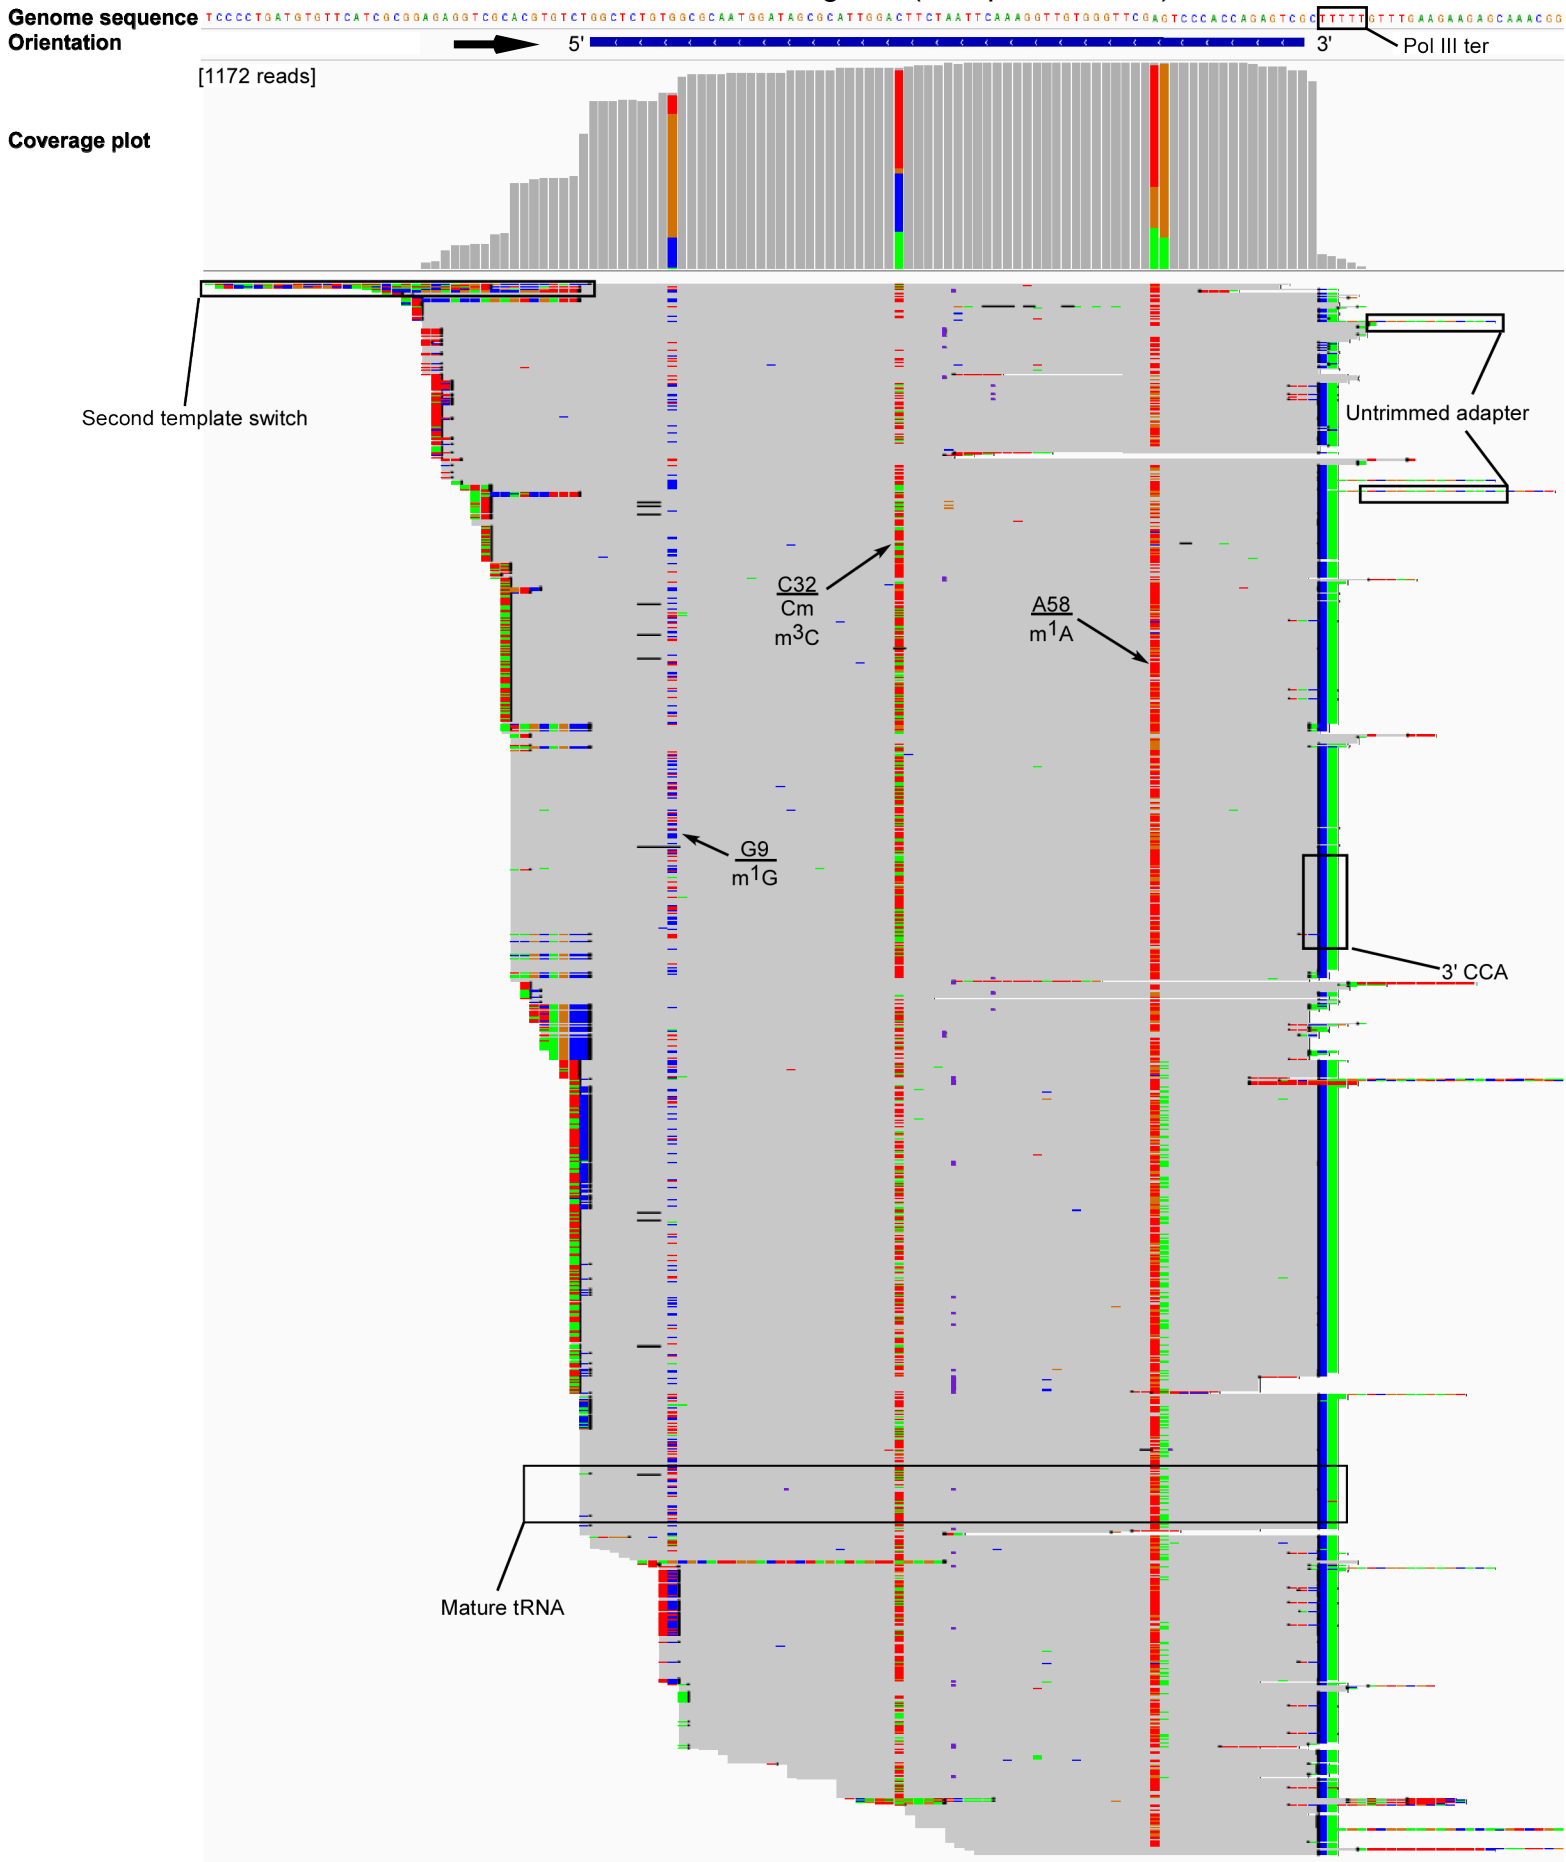

chr6.tRNA140-LeuCAA ( vs gene )

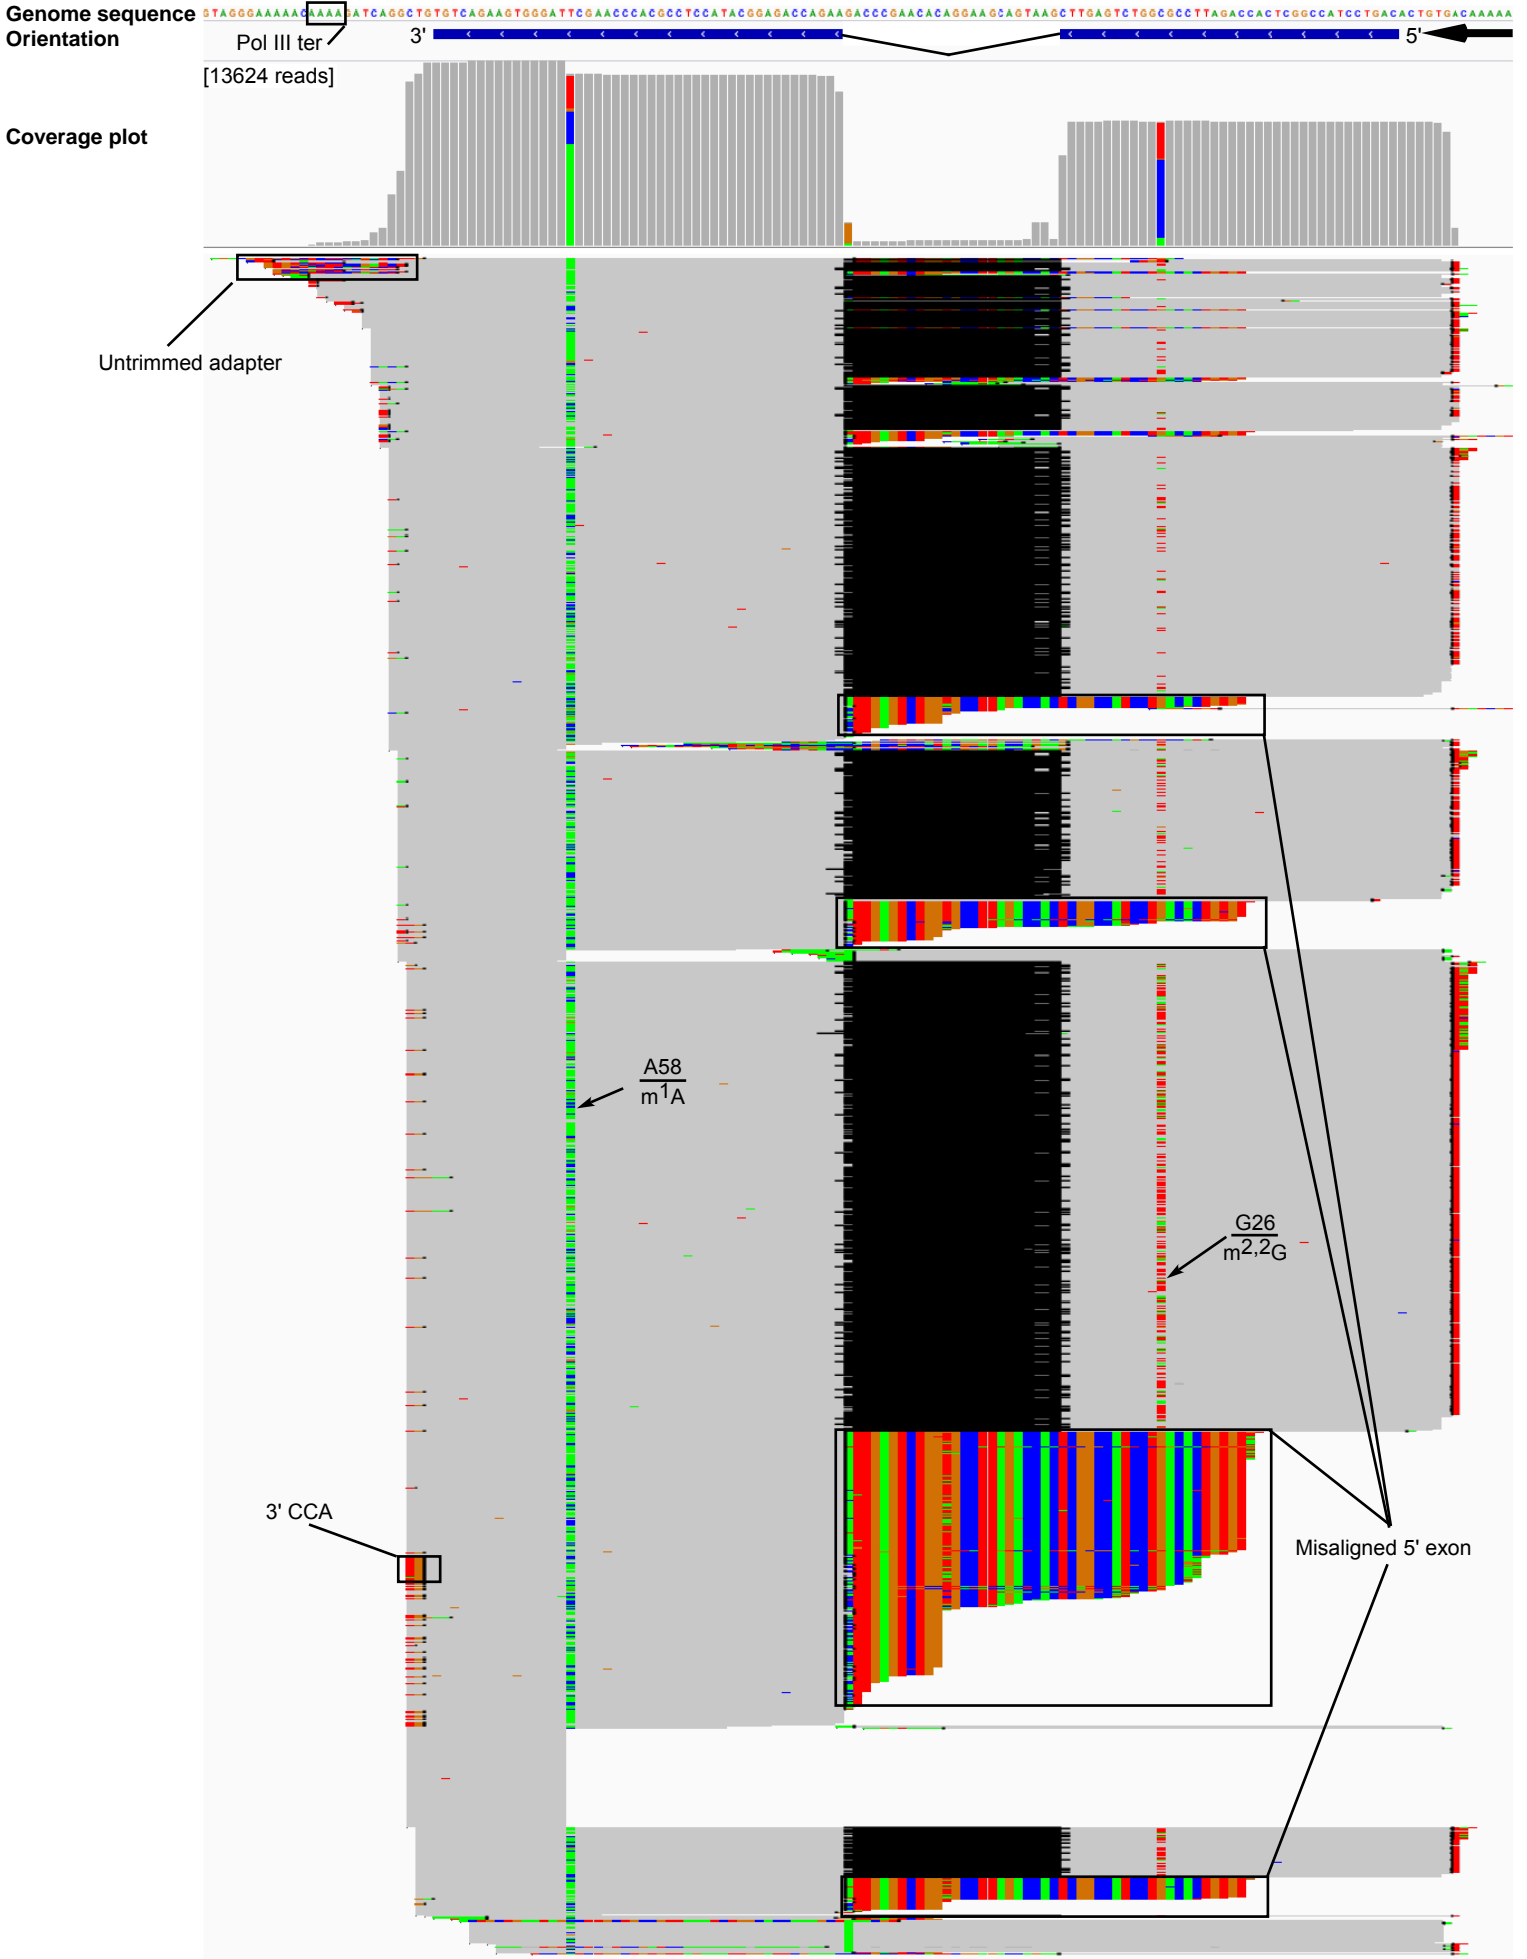



# chr6.tRNA140-LeuCAA ( vs spliced tRNA )

Genome sequence  
Orientation

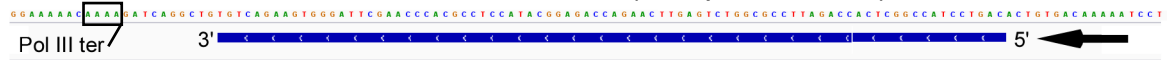

Coverage plot

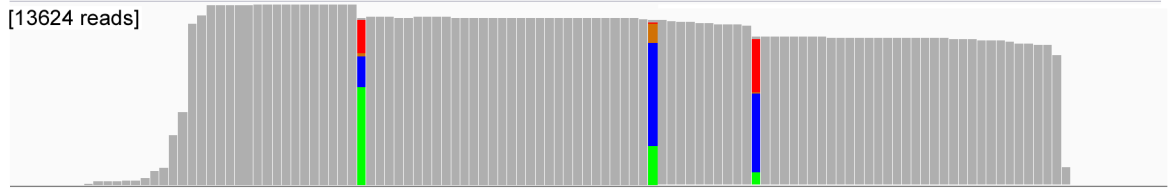

Unspliced pre-tRNA  
fragment

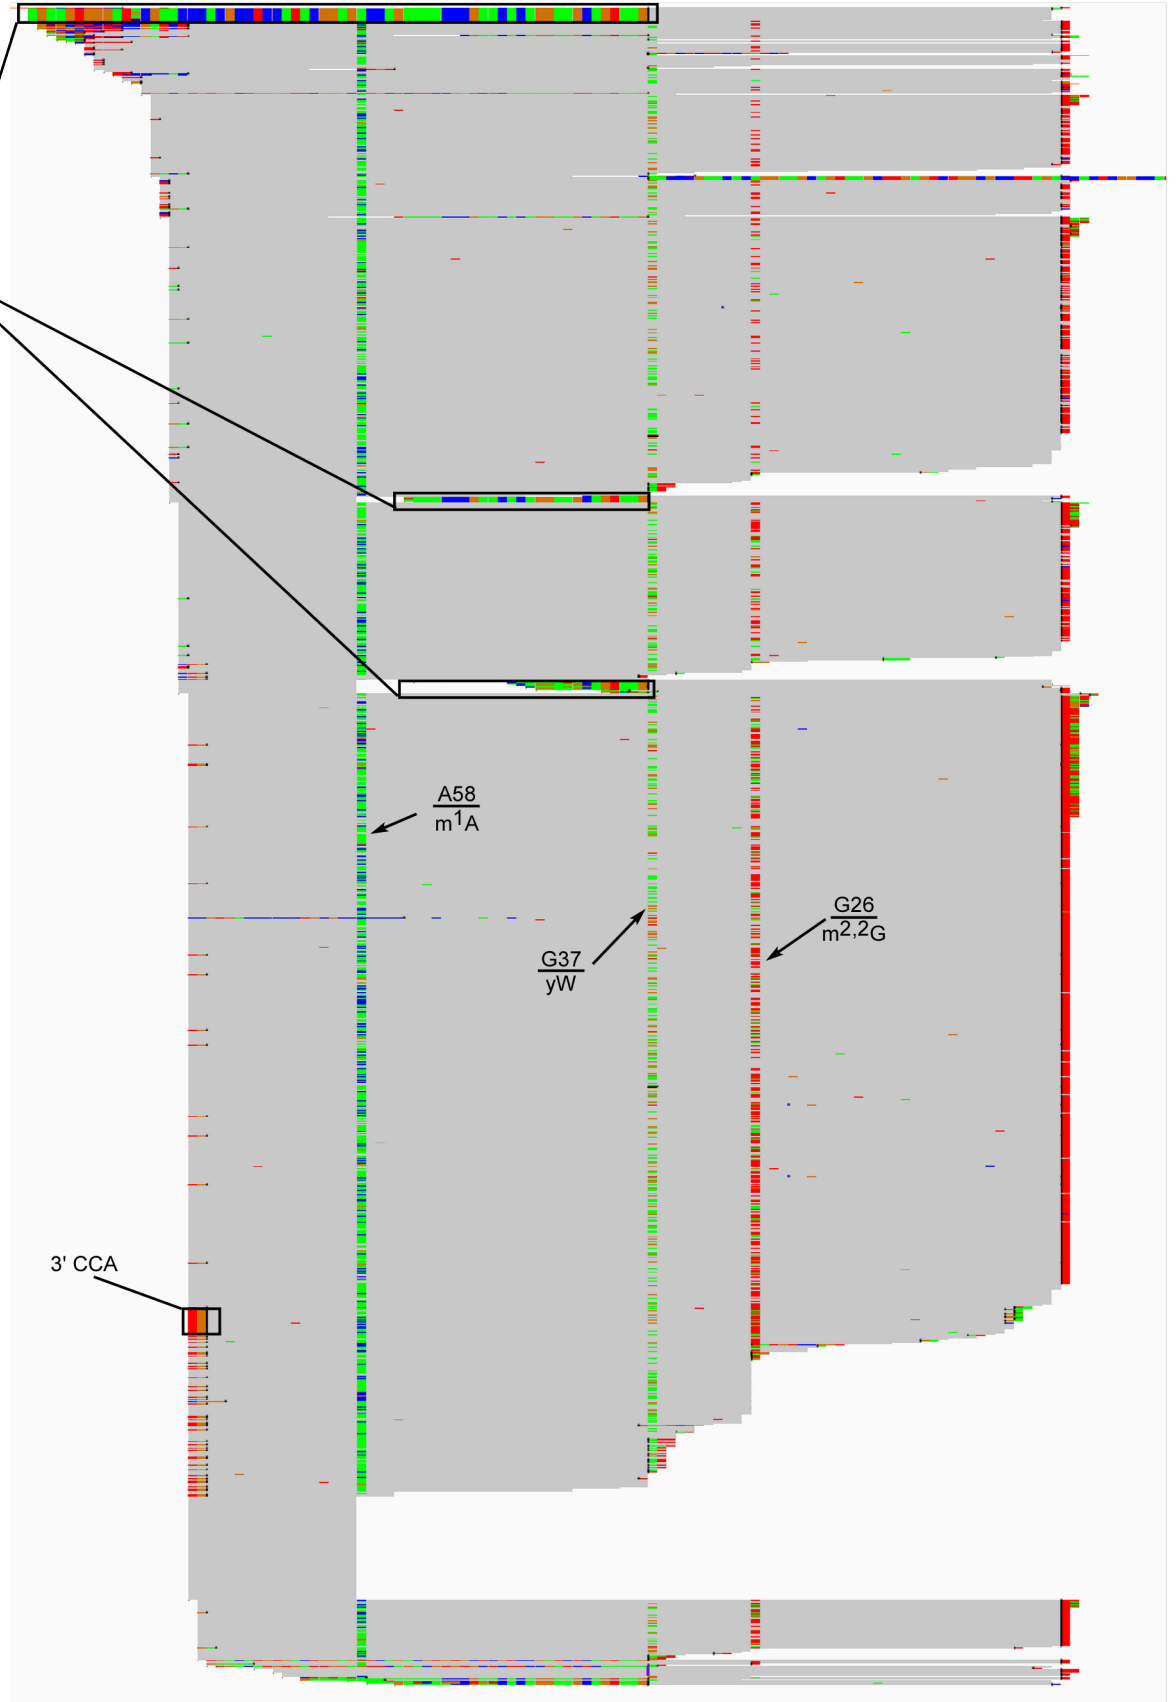

A58  
m<sup>1</sup>A

G37  
yW

G26  
m<sup>2,2</sup>G

3' CCA

# chr1.tRNA91-PseudoCCC

Genome sequence GGGTAAAGAGCCATAGTGAAGAGCCAAAATACCTCTTATCTTTGACCGGGAATTAAGAACCCGGGCTCCTCCGCGTGGGAGCGGAGAAATTCACCACTGAACCCACCAAGTGCCTCTCTAGCAACCCCTGGGAGA

Orientation

Pol III ter

3'

5'

[2539 reads]

Coverage plot

Untrimmed adapter

Poly-U tails

Putative sequence polymorphism

Second template switch

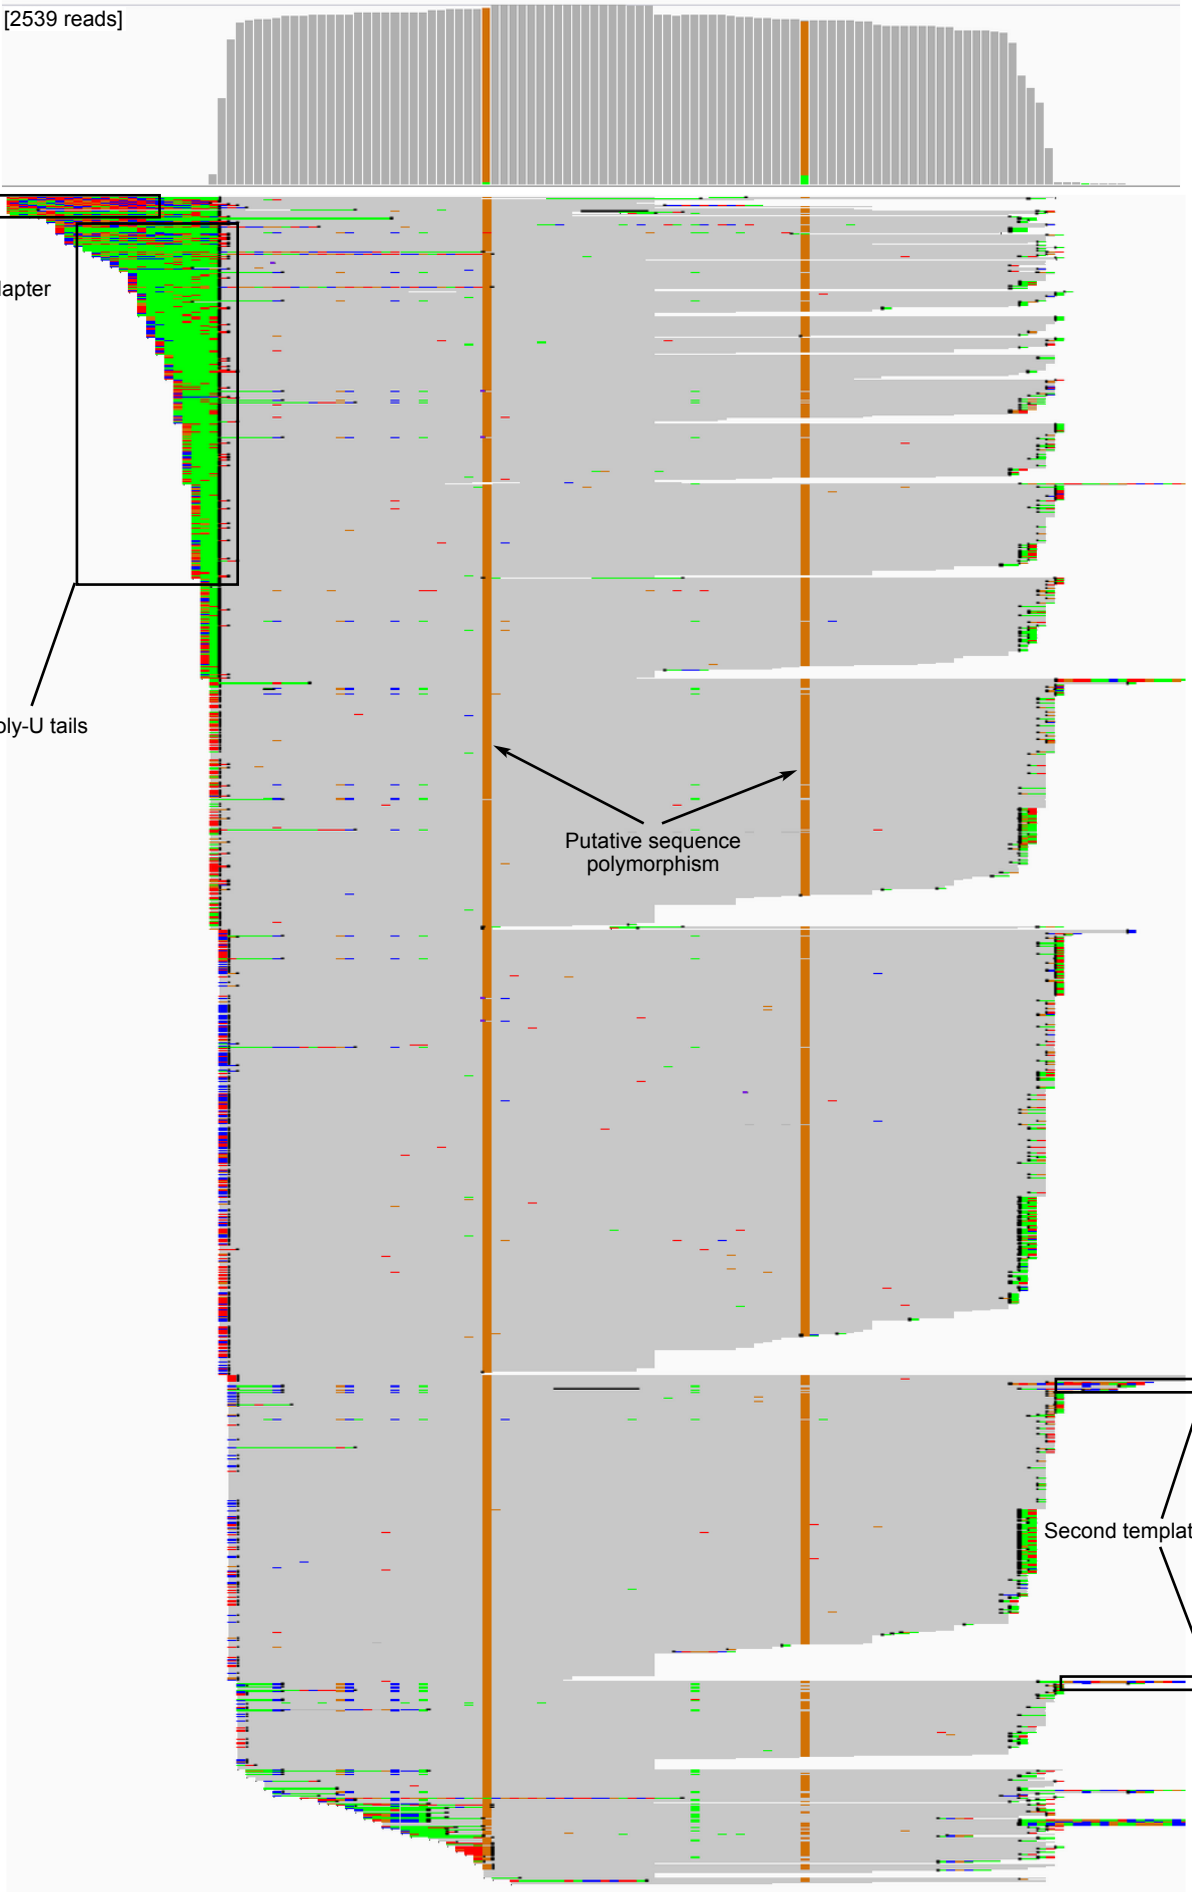

# SNAR.A-10

Pol III ter

Genome sequence  
Orientation

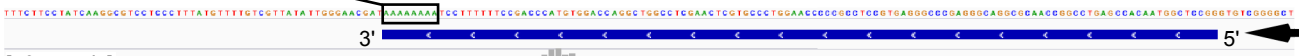

[494 reads]

Coverage plot

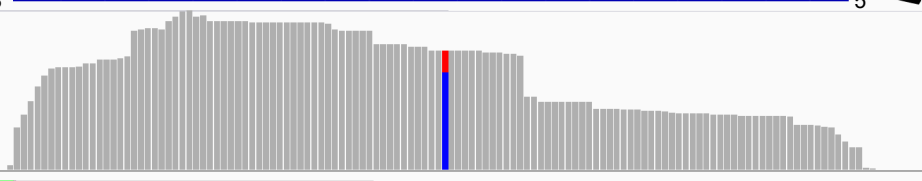

Untrimmed adapter

Poly-U tails

Potential post-transcriptional modification

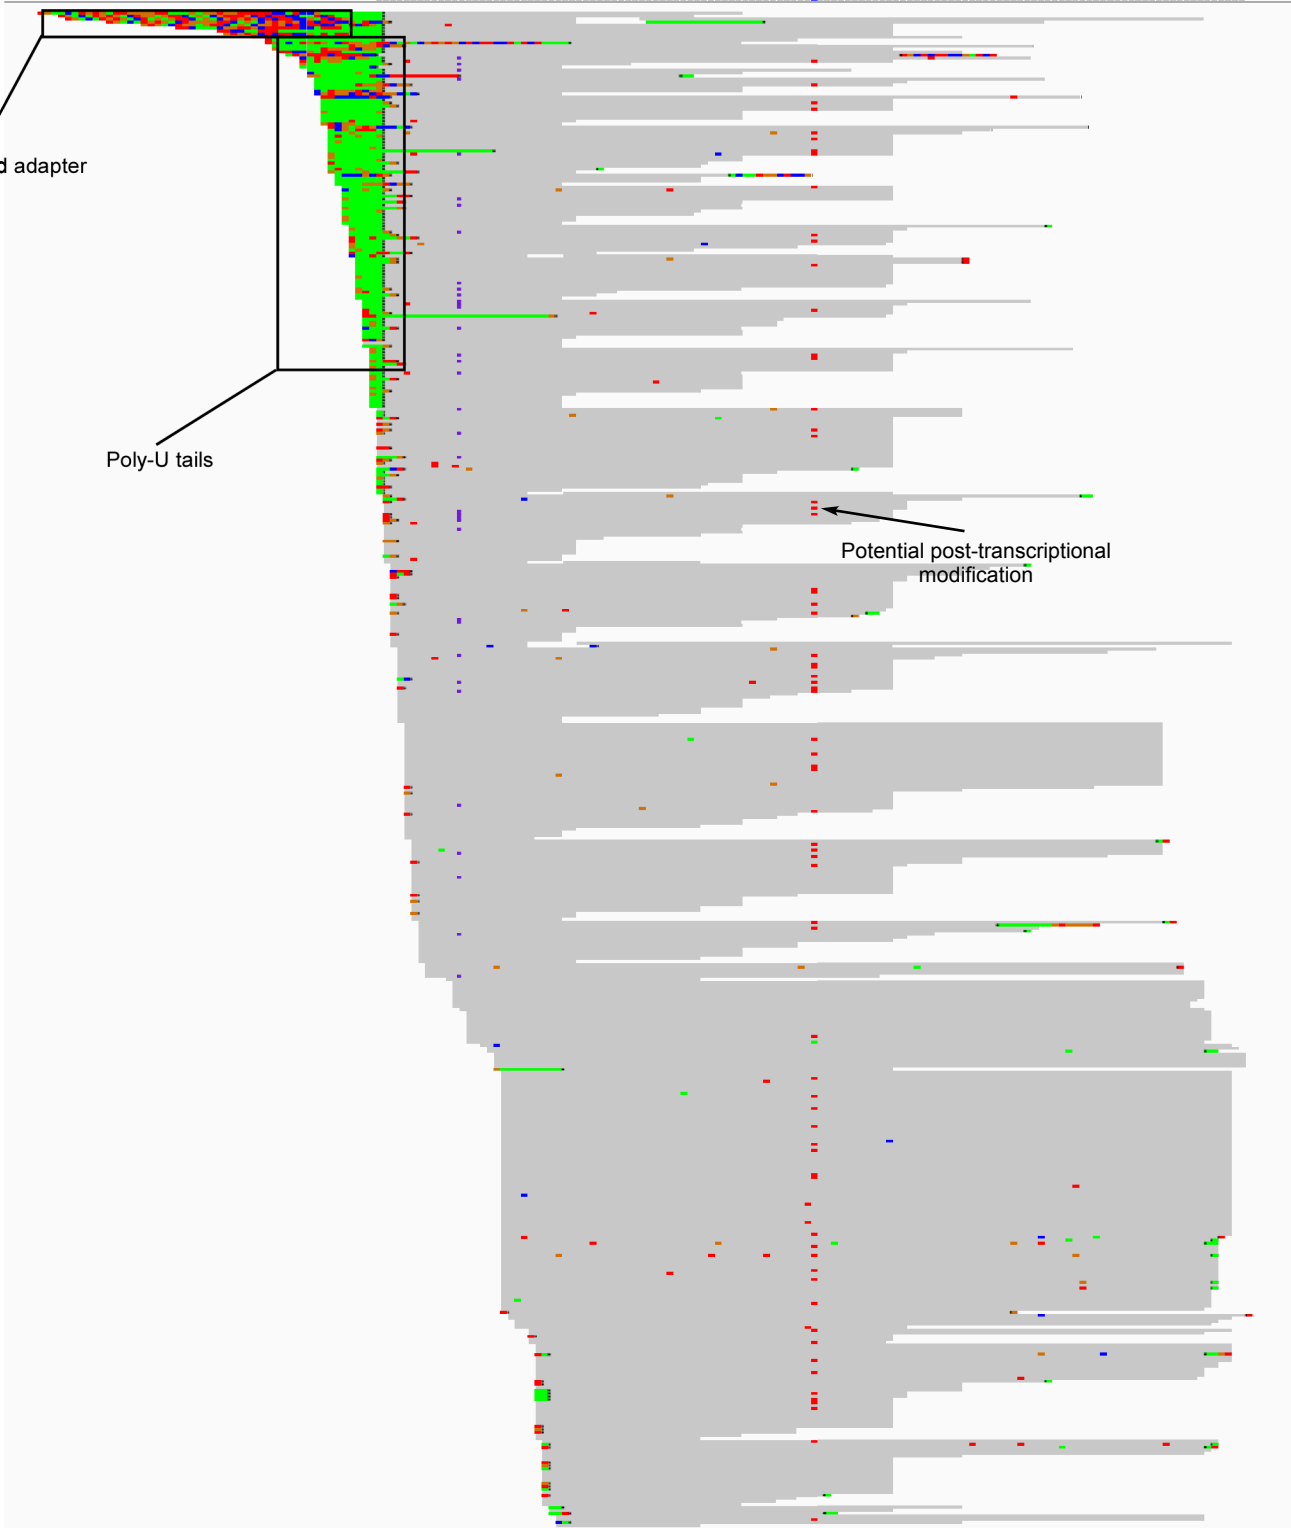

# 5S1.rRNA

Genome sequence  
Orientation

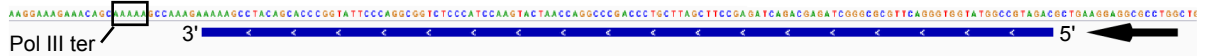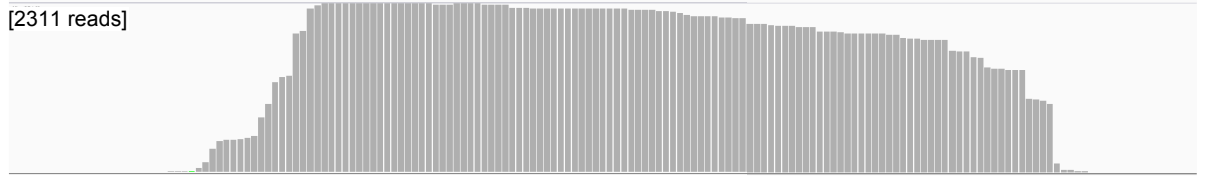

Coverage plot

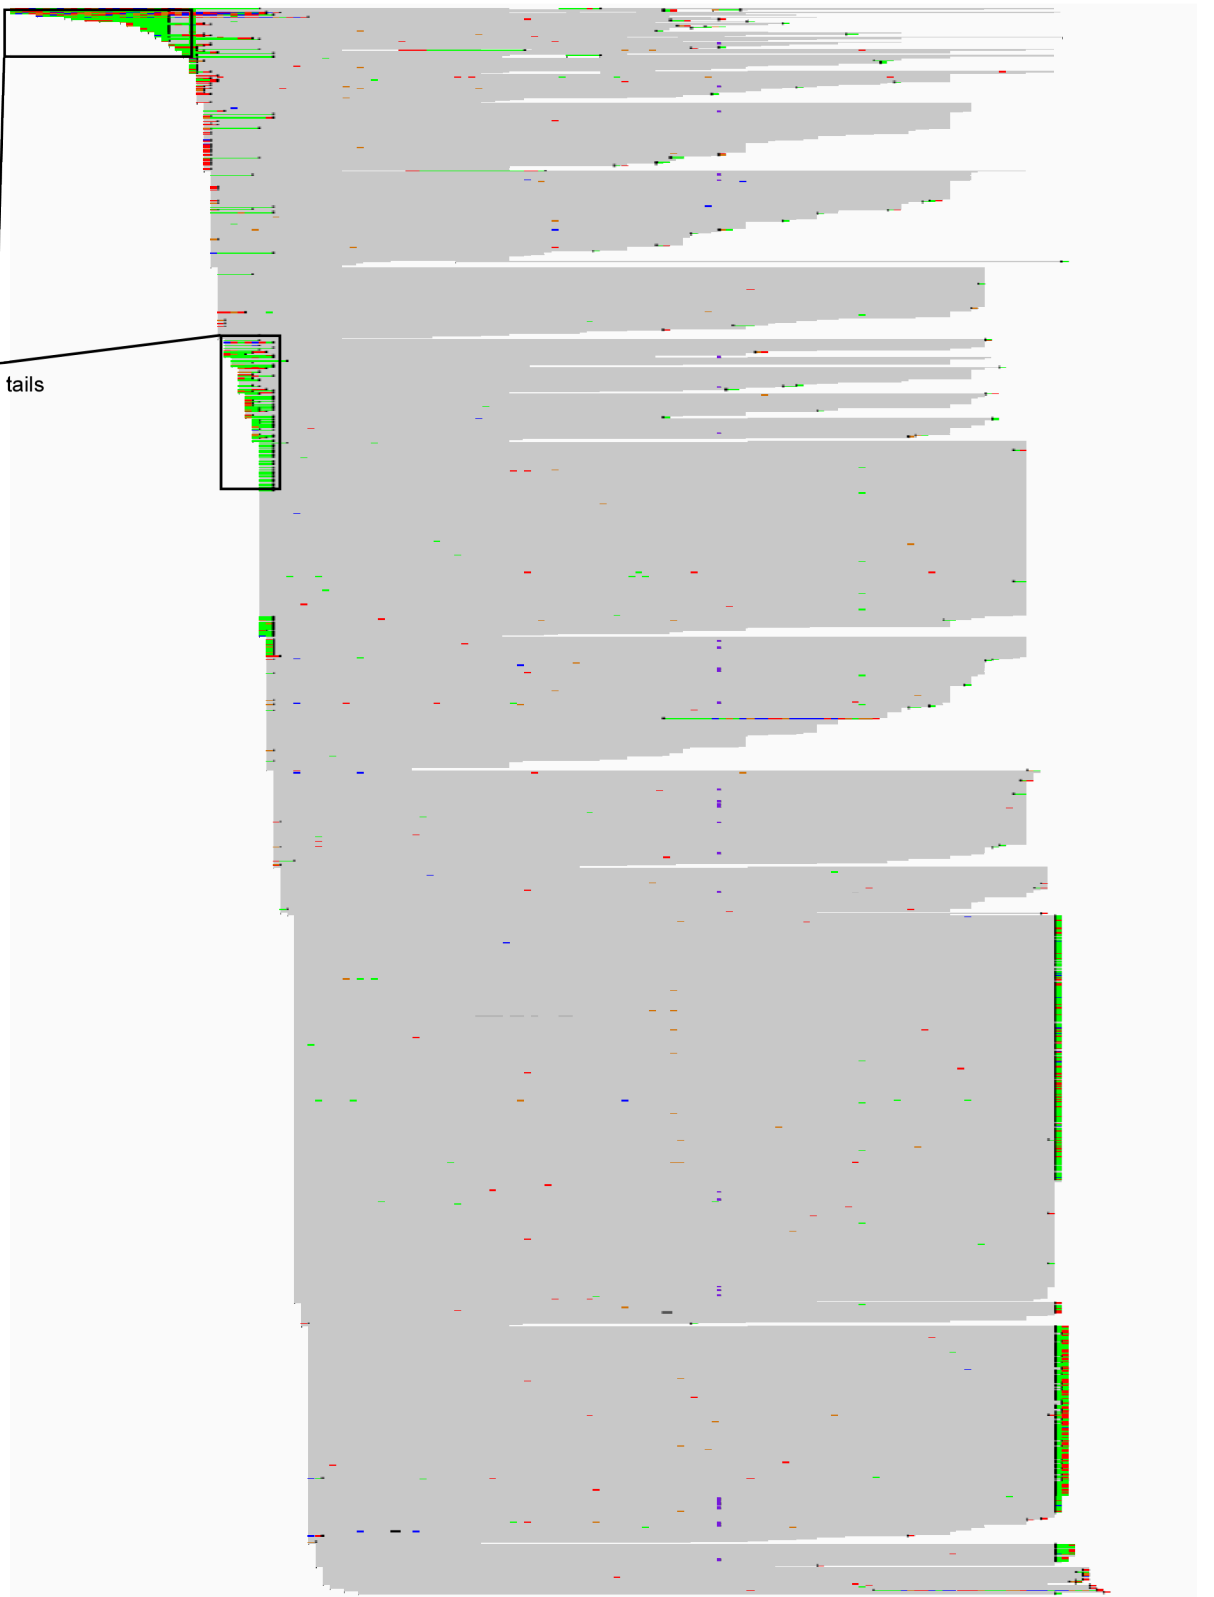

Supplement: 1412842111_pnas.1412842111.sfig07.pdf [file 1412842111_pnas.1412842111.sfig07.pdf]
