# Supplementary material
Source: PubMed Central journal article supplement (PMC4143023)
Supplement: 1412842111_pnas.1412842111.sfig08.pdf [file 1412842111_pnas.1412842111.sfig08.pdf]

| Cross-linked        |       |        | Native -            |       |        | Native +            |       |        |
|---------------------|-------|--------|---------------------|-------|--------|---------------------|-------|--------|
| Gene Name           | Count |        | Gene Name           | Count |        | Gene Name           | Count |        |
| 1.tRNA91-PseudoCCC  | 2565  | 1.0000 | 6.tRNA41-PseudoACT  | 15424 | 1.0000 | 1.tRNA91-PseudoCCC  | 12354 | 1.0000 |
| 6.tRNA41-PseudoACT  | 2334  | 0.9099 | 1.tRNA91-PseudoCCC  | 7649  | 0.4959 | 6.tRNA41-PseudoACT  | 11245 | 0.9102 |
| 1.tRNA3-PseudoCAC   | 1025  | 0.3996 | 1.tRNA3-PseudoCAC   | 4764  | 0.3089 | 1.tRNA3-PseudoCAC   | 5931  | 0.4801 |
| 1.tRNA132-PseudoCAC | 710   | 0.2768 | 1.tRNA132-PseudoCAC | 3708  | 0.2404 | 1.tRNA132-PseudoCAC | 4209  | 0.3407 |
| 16.tRNA13-PseudoCTT | 665   | 0.2593 | 16.tRNA13-PseudoCTT | 2741  | 0.1777 | 16.tRNA13-PseudoCTT | 3463  | 0.2803 |
| 1.tRNA110-PseudoTTC | 217   | 0.0846 | 1.tRNA23-PseudoCTG  | 1385  | 0.0898 | 1.tRNA23-PseudoCTG  | 1879  | 0.1521 |
| 1.tRNA23-PseudoCTG  | 180   | 0.0702 | 1.tRNA110-PseudoTTC | 1109  | 0.0719 | 1.tRNA110-PseudoTTC | 1539  | 0.1246 |
| 14.tRNA12-PseudoTTT | 154   | 0.0600 | 1.tRNA27-PseudoCTG  | 805   | 0.0522 | 1.tRNA27-PseudoCTG  | 922   | 0.0746 |
| 1.tRNA27-PseudoCTG  | 146   | 0.0569 | 6.tRNA122-PseudoTGC | 331   | 0.0215 | 6.tRNA122-PseudoTGC | 275   | 0.0223 |
| 3.tRNA10-PseudoCTC  | 77    | 0.0300 | 13.tRNA2-PseudoCTC  | 164   | 0.0106 | 14.tRNA12-PseudoTTT | 212   | 0.0172 |
| 2.tRNA18-PseudoCTC  | 52    | 0.0203 | 7.tRNA24-PseudoGTA  | 151   | 0.0098 | 13.tRNA2-PseudoCTC  | 177   | 0.0143 |
| 6.tRNA122-PseudoTGC | 51    | 0.0199 | 14.tRNA12-PseudoTTT | 126   | 0.0082 | 6.tRNA116-PseudoGAA | 164   | 0.0133 |
| 13.tRNA2-PseudoCTC  | 46    | 0.0179 | 6.tRNA116-PseudoGAA | 108   | 0.0070 | 7.tRNA24-PseudoGTA  | 130   | 0.0105 |
| 7.tRNA24-PseudoGTA  | 30    | 0.0117 | 15.tRNA6-PseudoCTT  | 77    | 0.0050 | 15.tRNA6-PseudoCTT  | 97    | 0.0079 |
| 1.tRNA92-PseudoGAA  | 24    | 0.0094 | 1.tRNA33-Pseudo???  | 76    | 0.0049 | 1.tRNA33-Pseudo???  | 75    | 0.0061 |
| 1.tRNA100-PseudoGAA | 23    | 0.0090 | 6.tRNA118-PseudoTTT | 38    | 0.0025 | 6.tRNA111-PseudoAGC | 67    | 0.0054 |
| 6.tRNA116-PseudoGAA | 19    | 0.0074 | 6.tRNA111-PseudoAGC | 35    | 0.0023 | 2.tRNA18-PseudoCTC  | 66    | 0.0053 |
| 2.tRNA1-PseudoCCC   | 18    | 0.0070 | 1.tRNA100-PseudoGAA | 34    | 0.0022 | 6.tRNA118-PseudoTTT | 66    | 0.0053 |
| 1.tRNA33-Pseudo???  | 13    | 0.0051 | 1.tRNA92-PseudoGAA  | 33    | 0.0021 | 1.tRNA100-PseudoGAA | 65    | 0.0053 |
| 6.tRNA88-PseudoGAA  | 10    | 0.0039 | 3.tRNA10-PseudoCTC  | 27    | 0.0018 | 3.tRNA10-PseudoCTC  | 58    | 0.0047 |
| 1.tRNA105-PseudoTTC | 9     | 0.0035 | 3.tRNA12-PseudoGCA  | 21    | 0.0014 | 6.tRNA86-PseudoTAC  | 51    | 0.0041 |
| 16.tRNA31-PseudoTGG | 7     | 0.0027 | 1.tRNA1-PseudoCAC   | 20    | 0.0013 | 1.tRNA92-PseudoGAA  | 44    | 0.0036 |
| 2.tRNA17-PseudoTTC  | 7     | 0.0027 | 6.tRNA86-PseudoTAC  | 20    | 0.0013 | 3.tRNA12-PseudoGCA  | 37    | 0.0030 |
| 5.tRNA17-PseudoAAG  | 7     | 0.0027 | 2.tRNA8-PseudoAGG   | 19    | 0.0012 | 2.tRNA12-PseudoCTC  | 21    | 0.0017 |
| 15.tRNA6-PseudoCTT  | 6     | 0.0023 | 2.tRNA18-PseudoCTC  | 17    | 0.0011 | 1.tRNA1-PseudoCAC   | 18    | 0.0015 |
| 2.tRNA8-PseudoAGG   | 5     | 0.0019 | 19.tRNA9-PseudoTTT  | 11    | 0.0007 | 2.tRNA1-PseudoCCC   | 17    | 0.0014 |
| 2.tRNA24-PseudoCTC  | 4     | 0.0016 | 2.tRNA15-PseudoCTG  | 9     | 0.0006 | 2.tRNA8-PseudoAGG   | 14    | 0.0011 |
| 14.tRNA15-PseudoTAG | 3     | 0.0012 | 2.tRNA1-PseudoCCC   | 8     | 0.0005 | 2.tRNA17-PseudoTTC  | 12    | 0.0010 |
| 3.tRNA12-PseudoGCA  | 3     | 0.0012 | 2.tRNA12-PseudoCTC  | 7     | 0.0005 | 16.tRNA31-PseudoTGG | 11    | 0.0009 |
| 12.tRNA15-PseudoTTG | 2     | 0.0008 | 2.tRNA25-PseudoCTC  | 7     | 0.0005 | 19.tRNA9-PseudoTTT  | 10    | 0.0008 |
| 4.tRNA5-PseudoTTA   | 2     | 0.0008 | 10.tRNA3-PseudoCAA  | 4     | 0.0003 | 10.tRNA3-PseudoCAA  | 9     | 0.0007 |
| 8.tRNA2-PseudoTTT   | 2     | 0.0008 | 14.tRNA15-PseudoTAG | 4     | 0.0003 | 1.tRNA105-PseudoTTC | 7     | 0.0006 |
| 1.tRNA102-PseudoTTC | 1     | 0.0004 | 2.tRNA17-PseudoTTC  | 4     | 0.0003 | 12.tRNA15-PseudoTTG | 7     | 0.0006 |
| 1.tRNA125-PseudoGTT | 1     | 0.0004 | 1.tRNA105-PseudoTTC | 3     | 0.0002 | 2.tRNA15-PseudoCTG  | 6     | 0.0005 |
| 1.tRNA44-PseudoGTC  | 1     | 0.0004 | 1.tRNA125-PseudoGTT | 3     | 0.0002 | 2.tRNA7-PseudoAGG   | 6     | 0.0005 |
| 1.tRNA96-PseudoCCT  | 1     | 0.0004 | 1.tRNA129-PseudoCTG | 3     | 0.0002 | 1.tRNA60-PseudoTAA  | 4     | 0.0003 |
| 10.tRNA3-PseudoCAA  | 1     | 0.0004 | 1.tRNA60-PseudoTAA  | 3     | 0.0002 | 14.tRNA15-PseudoTAG | 4     | 0.0003 |
| 18.tRNA3-PseudoTCC  | 1     | 0.0004 | 16.tRNA31-PseudoTGG | 3     | 0.0002 | 5.tRNA17-PseudoAAG  | 4     | 0.0003 |
| 19.tRNA9-PseudoTTT  | 1     | 0.0004 | 2.tRNA7-PseudoAGG   | 3     | 0.0002 | 1.tRNA137-Pseudo??? | 3     | 0.0002 |
| 2.tRNA12-PseudoCTC  | 1     | 0.0004 | 5.tRNA17-PseudoAAG  | 3     | 0.0002 | 16.tRNA33-PseudoAGG | 3     | 0.0002 |
| 2.tRNA15-PseudoCTG  | 1     | 0.0004 | 1.tRNA137-Pseudo??? | 2     | 0.0001 | 2.tRNA24-PseudoCTC  | 3     | 0.0002 |
| 2.tRNA16-PseudoTTT  | 1     | 0.0004 | 1.tRNA14-PseudoCCT  | 2     | 0.0001 | 1.tRNA129-PseudoCTG | 2     | 0.0002 |
| 6.tRNA111-PseudoAGC | 1     | 0.0004 | 15.tRNA5-PseudoGTA  | 2     | 0.0001 | 1.tRNA51-PseudoCTT  | 2     | 0.0002 |
| 6.tRNA118-PseudoTTT | 1     | 0.0004 | 2.tRNA24-PseudoCTC  | 2     | 0.0001 | 18.tRNA2-PseudoTCC  | 2     | 0.0002 |
| 6.tRNA86-PseudoTAC  | 1     | 0.0004 | 4.tRNA5-PseudoTTA   | 2     | 0.0001 | 4.tRNA5-PseudoTTA   | 2     | 0.0002 |
| 8.tRNA7-PseudoCTC   | 1     | 0.0004 | 8.tRNA2-PseudoTTT   | 2     | 0.0001 | 6.tRNA88-PseudoGAA  | 2     | 0.0002 |
|                     |       |        | 1.tRNA61-PseudoTGG  | 1     | 0.0001 | 1.tRNA125-PseudoGTT | 1     | 0.0001 |
|                     |       |        | 12.tRNA15-PseudoTTG | 1     | 0.0001 | 1.tRNA126-Pseudo??? | 1     | 0.0001 |
|                     |       |        | 13.tRNA6-PseudoTTG  | 1     | 0.0001 | 1.tRNA88-PseudoCCT  | 1     | 0.0001 |
|                     |       |        | 16.tRNA33-PseudoAGG | 1     | 0.0001 | 1.tRNA96-PseudoCCT  | 1     | 0.0001 |
|                     |       |        | 17.tRNA33-PseudoTTG | 1     | 0.0001 | 2.tRNA25-PseudoCTC  | 1     | 0.0001 |
|                     |       |        | 18.tRNA3-PseudoTCC  | 1     | 0.0001 | 2.tRNA28-PseudoTTG  | 1     | 0.0001 |
|                     |       |        | 2.tRNA9-PseudoTAA   | 1     | 0.0001 | 20.tRNA3-PseudoCAC  | 1     | 0.0001 |
|                     |       |        | 6.tRNA88-PseudoGAA  | 1     | 0.0001 | 20.tRNA4-PseudoTAA  | 1     | 0.0001 |
|                     |       |        |                     |       |        | 6.tRNA85-PseudoTTC  | 1     | 0.0001 |
|                     |       |        |                     |       |        | X.tRNA1-PseudoTTG   | 1     | 0.0001 |
