# Supplementary material
Source: PubMed Central journal article supplement (PMC4143023)

# chr1.tRNA7-AsnGTT

Genome sequence  
Orientation

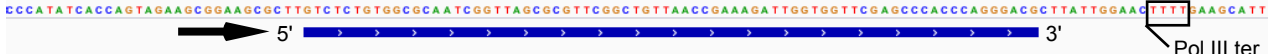

Coverage plot

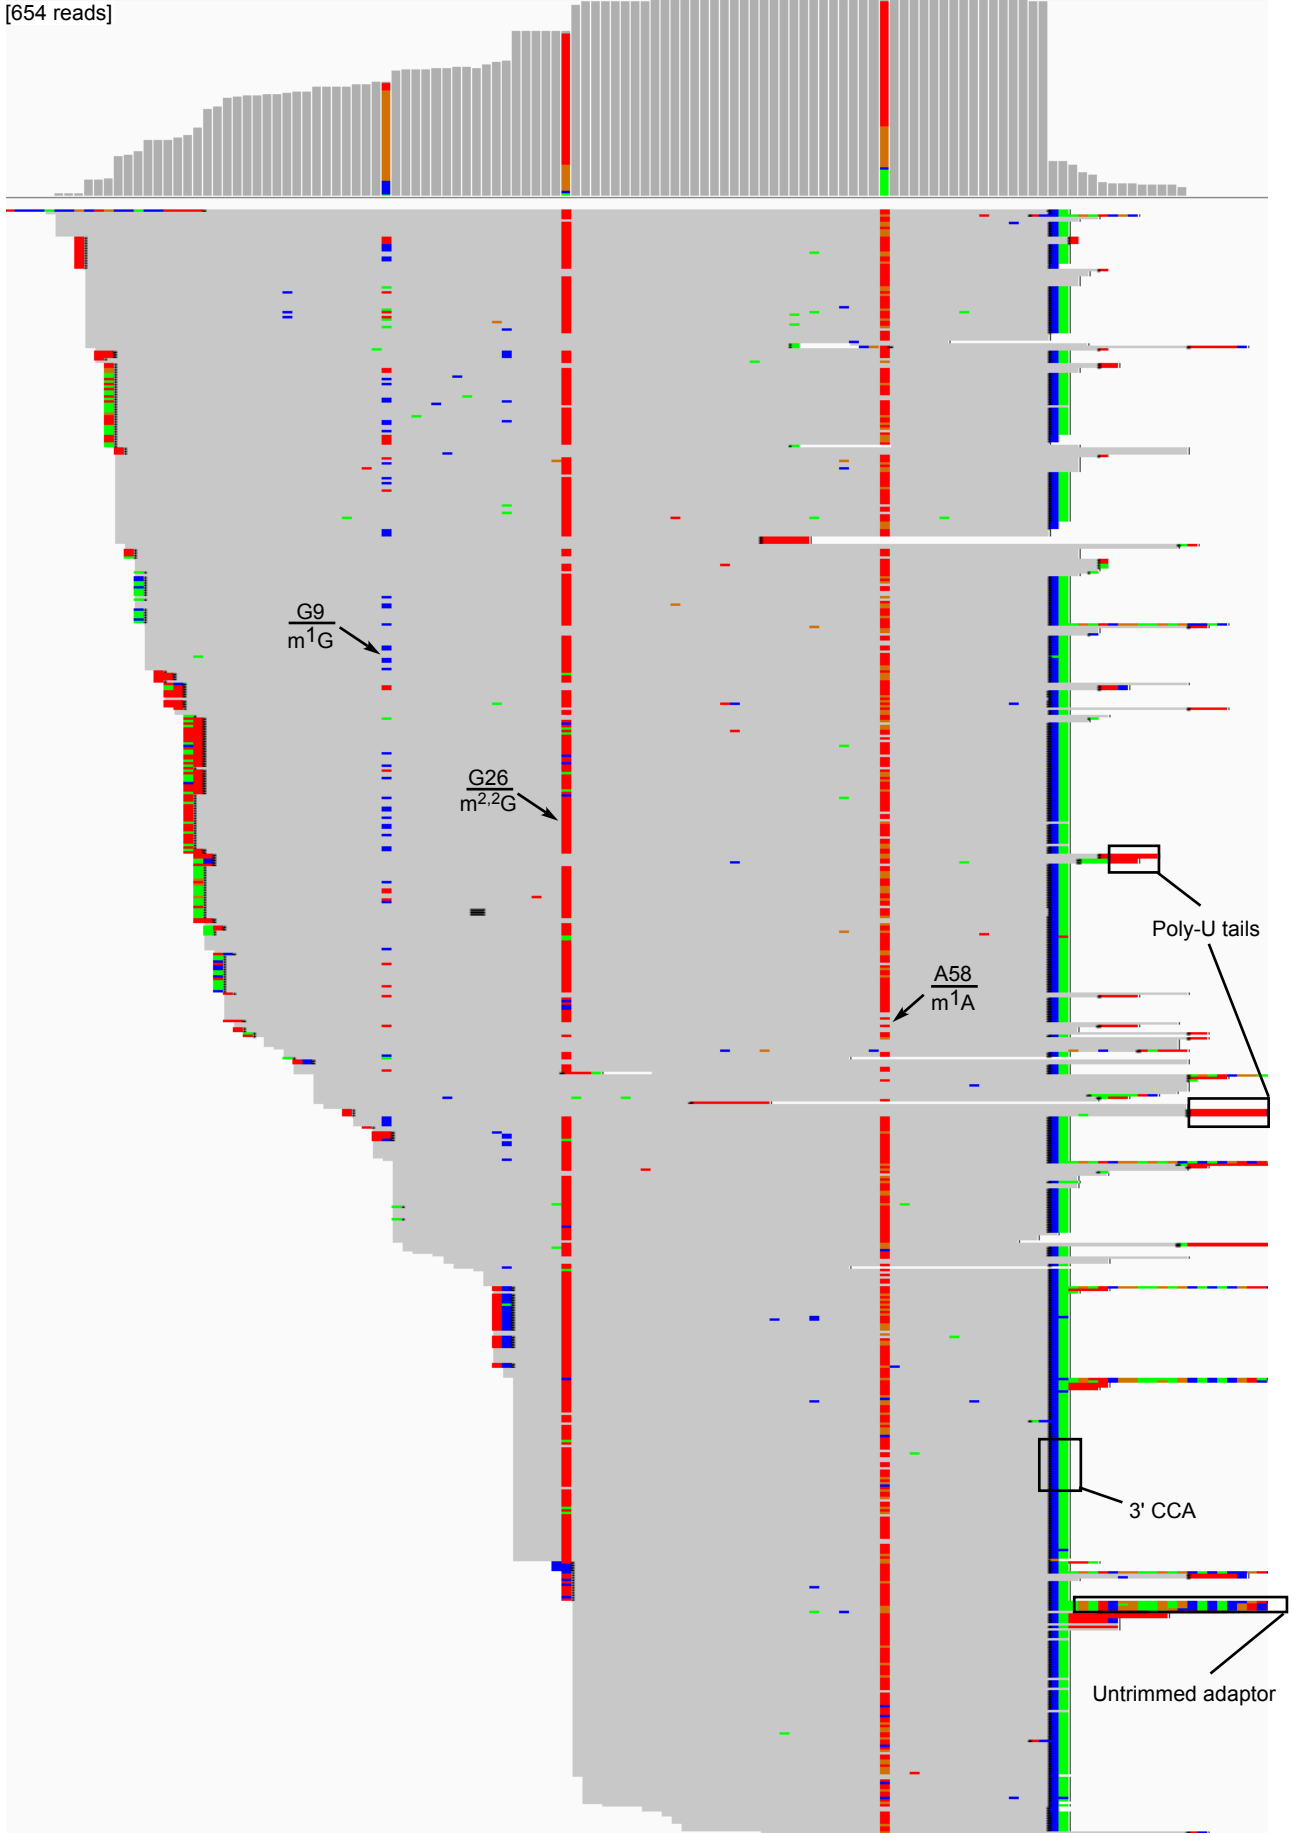

# chr1.tRNA120-GlnCTG

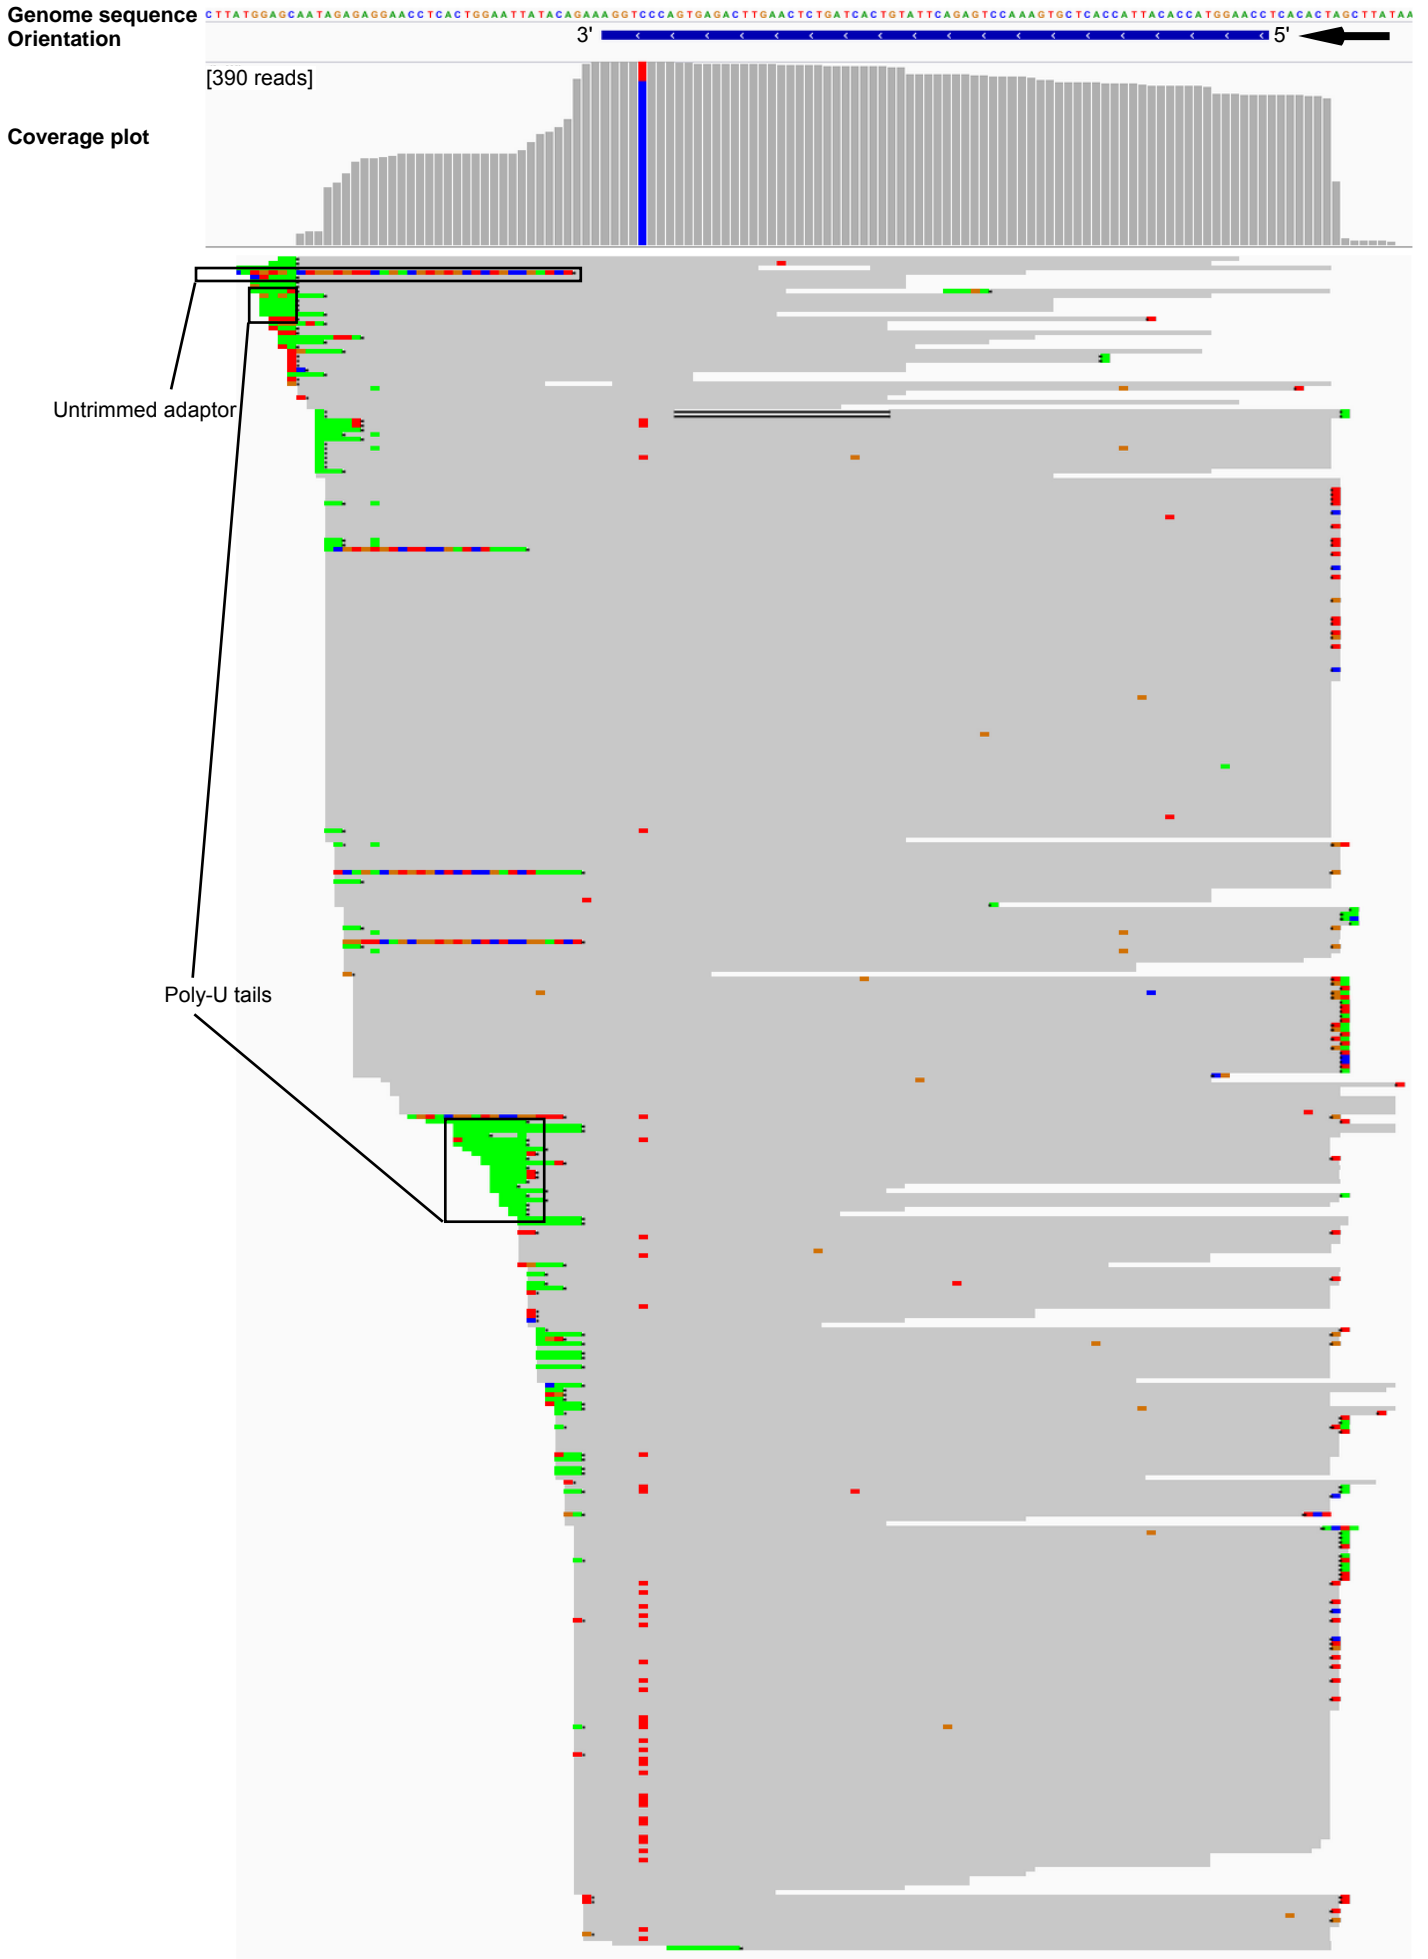

# chr17.tRNA14-ThrCGT

Genome sequence  
Orientation

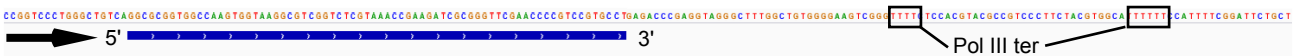

Coverage plot

[757 reads]

G9  
m<sup>1</sup>G

G26  
m<sup>2,2</sup>G

C32  
Cm  
m<sup>3</sup>C

A58  
m<sup>1</sup>A

3' CCA

Poly-U tails

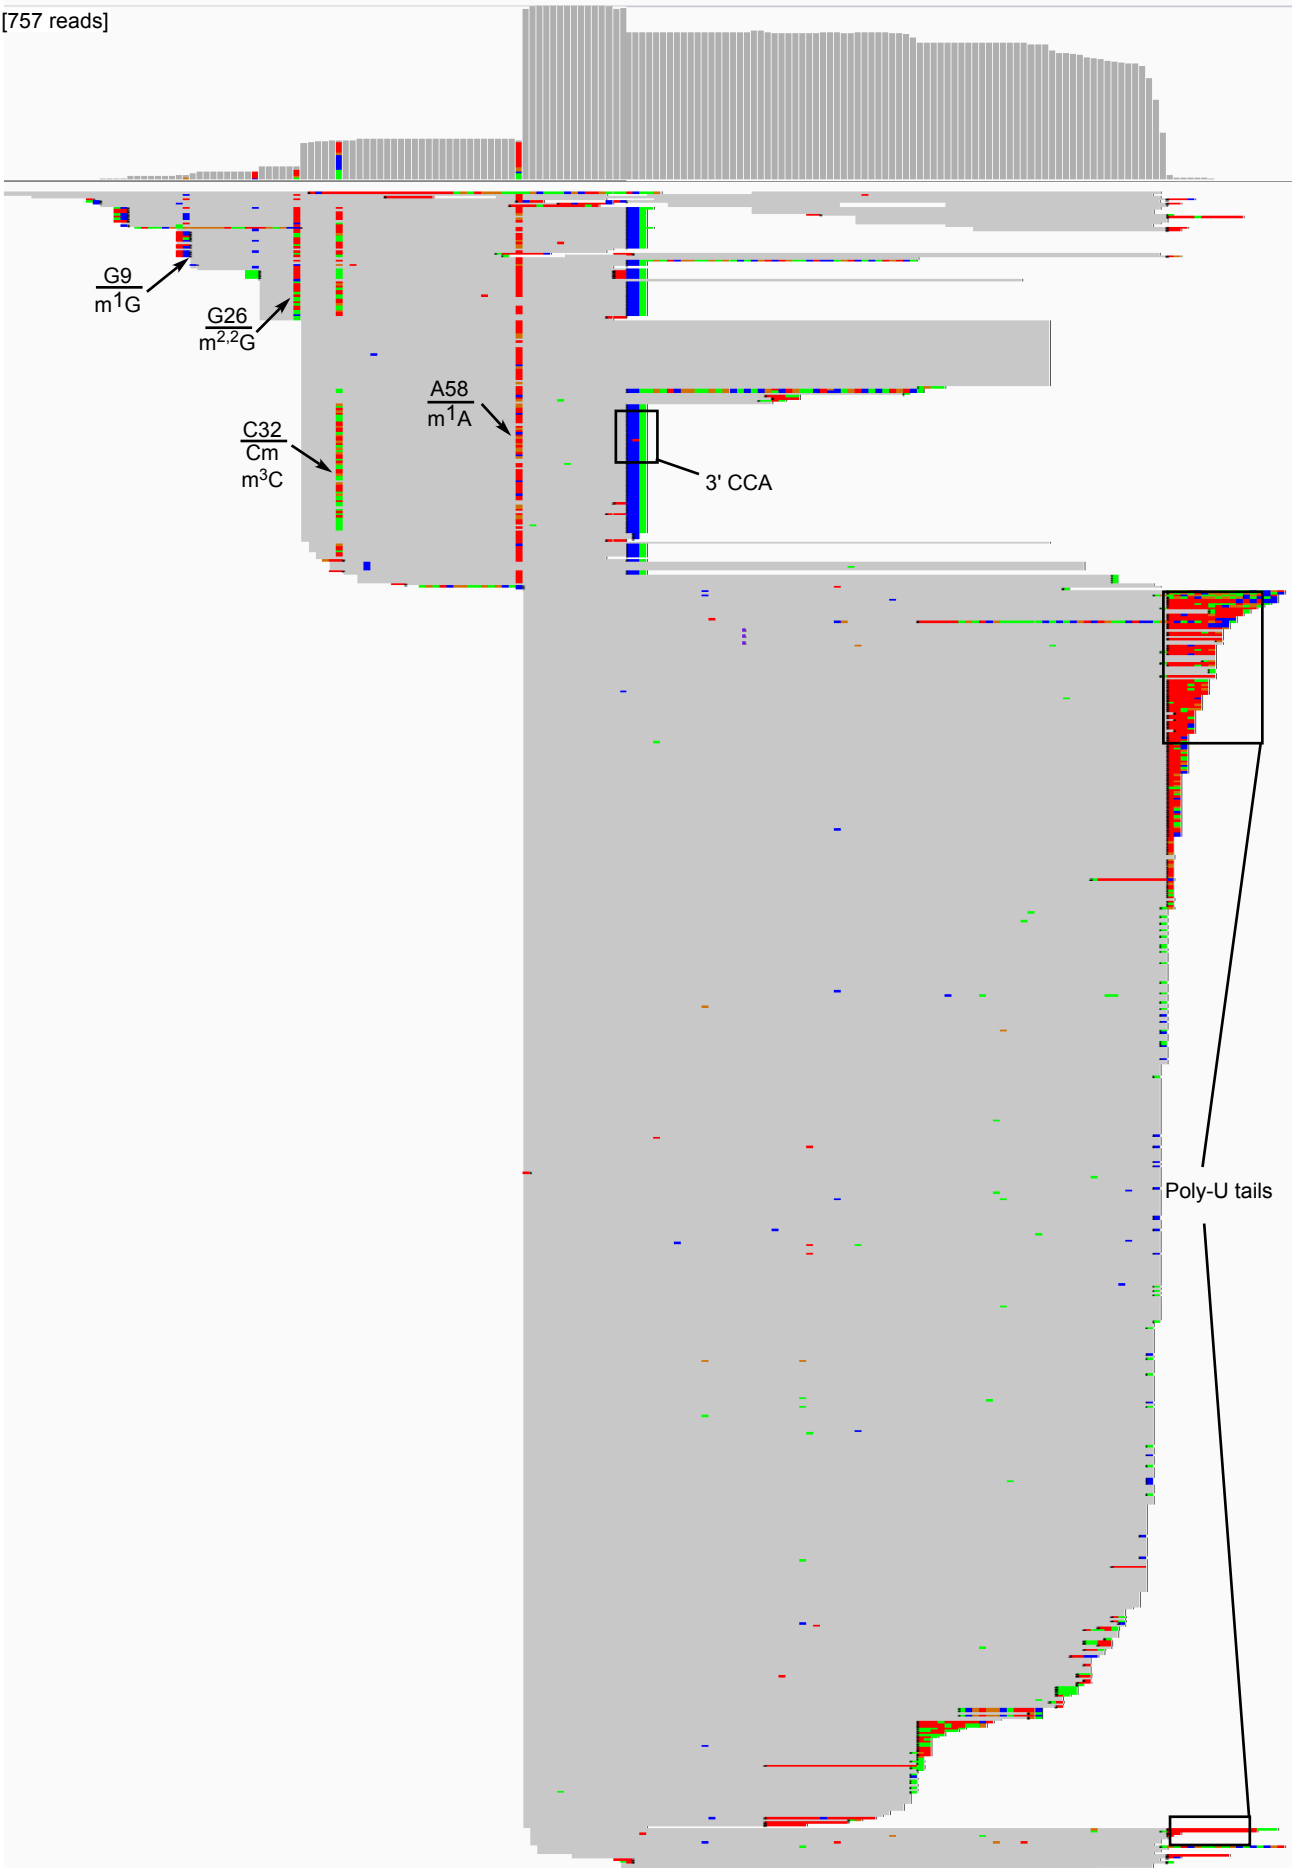

# chr7.tRNA20-CysGCA

Genome sequence  
Orientation

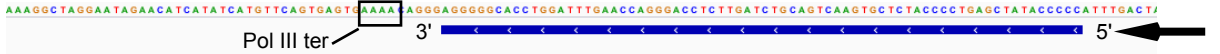

Coverage plot

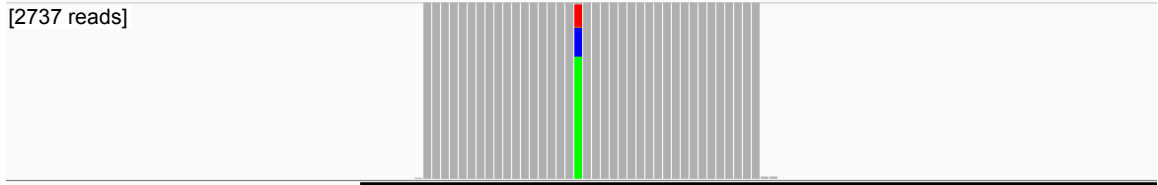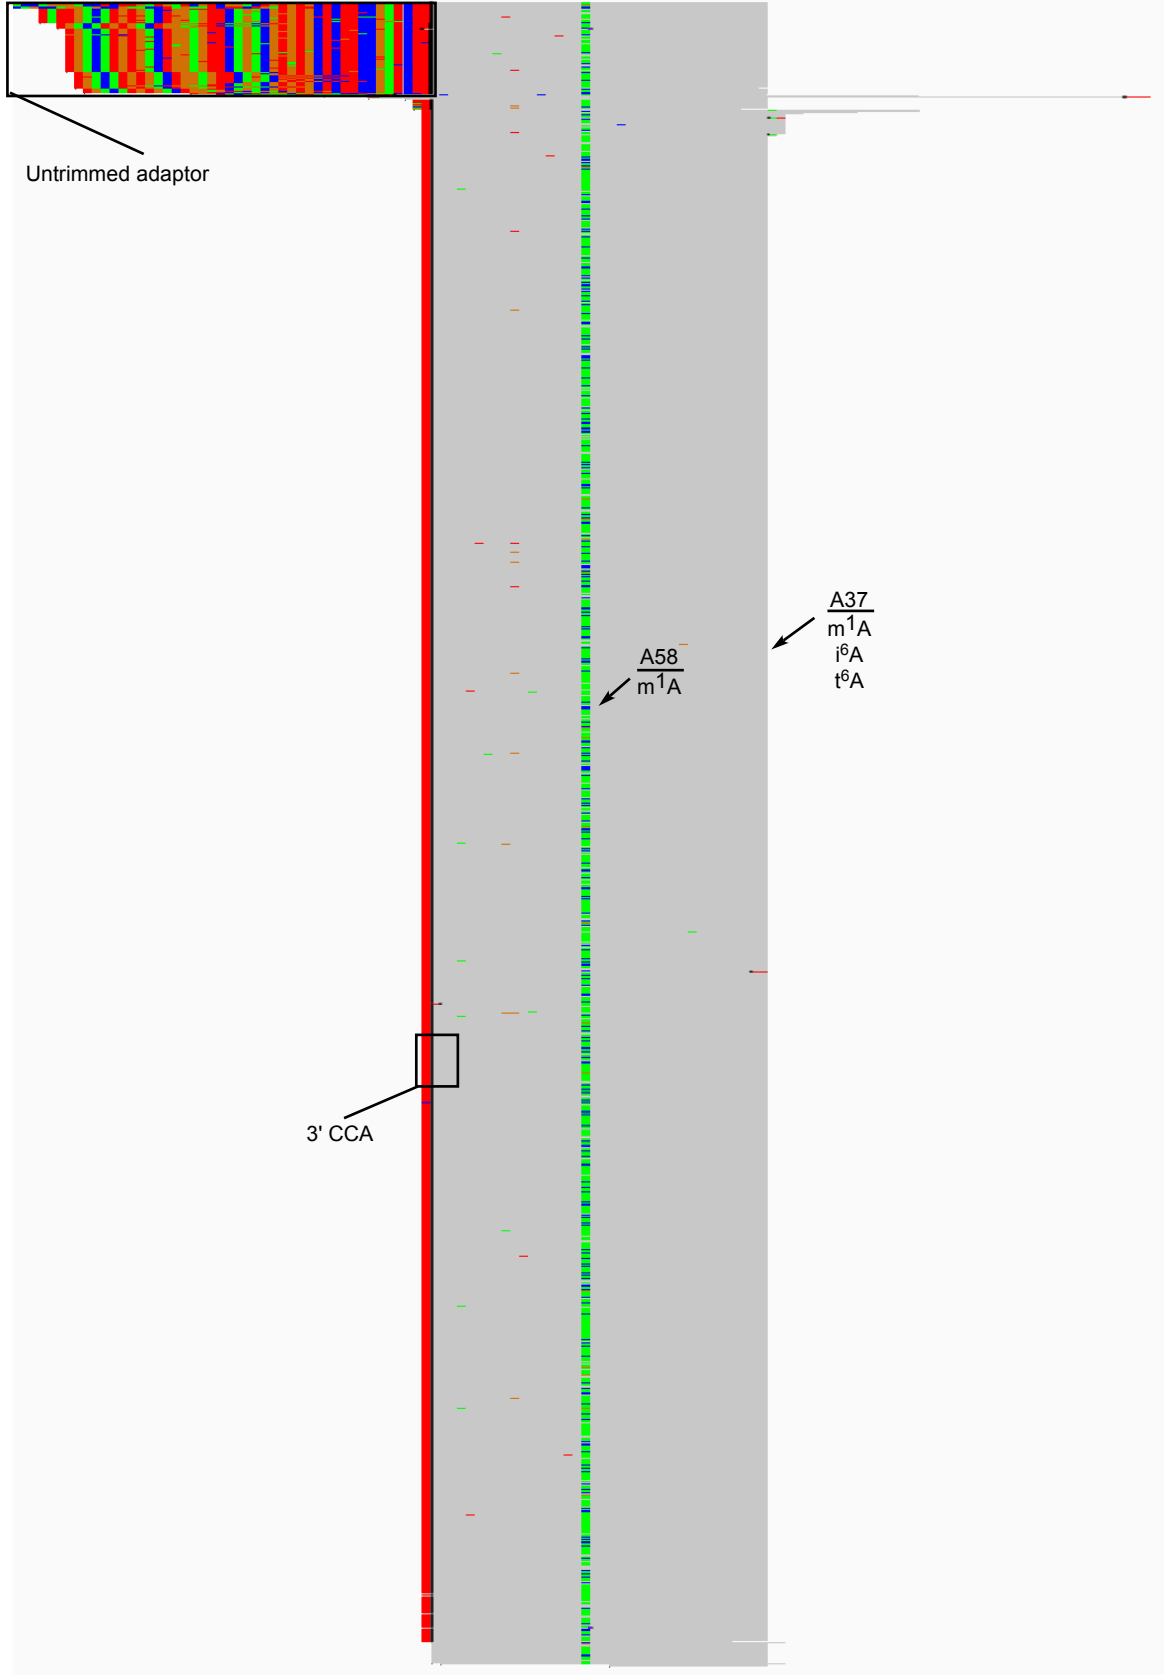

Supplement: 1412842111_pnas.1412842111.sfig09.pdf [file 1412842111_pnas.1412842111.sfig09.pdf]
