# Supplementary material
Source: PubMed Central journal article supplement (PMC4143023)

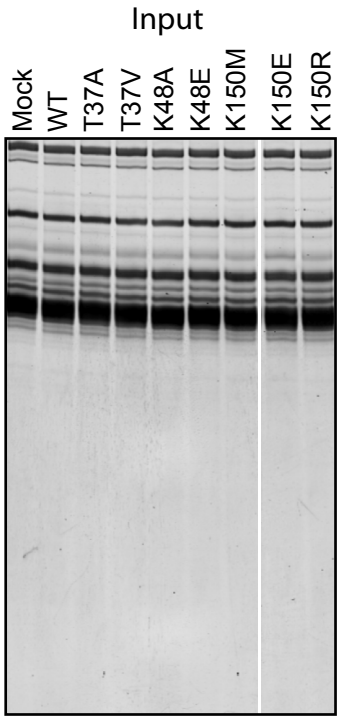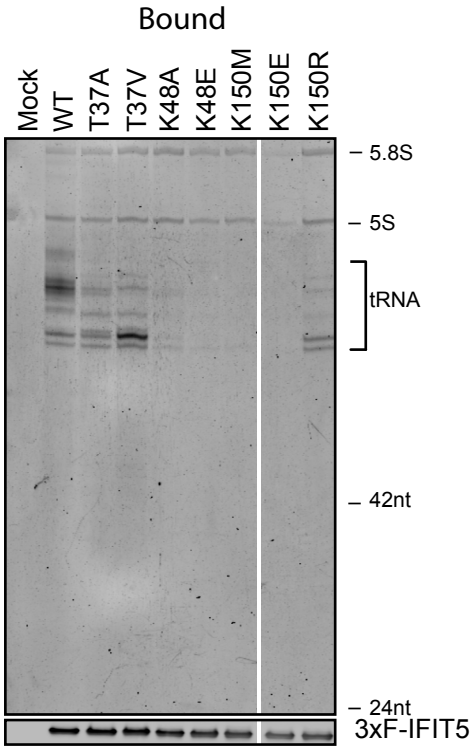

Supplement: 1412842111_pnas.1412842111.sfig01.pdf [file 1412842111_pnas.1412842111.sfig01.pdf]

**A****RNA Bound IFIT5**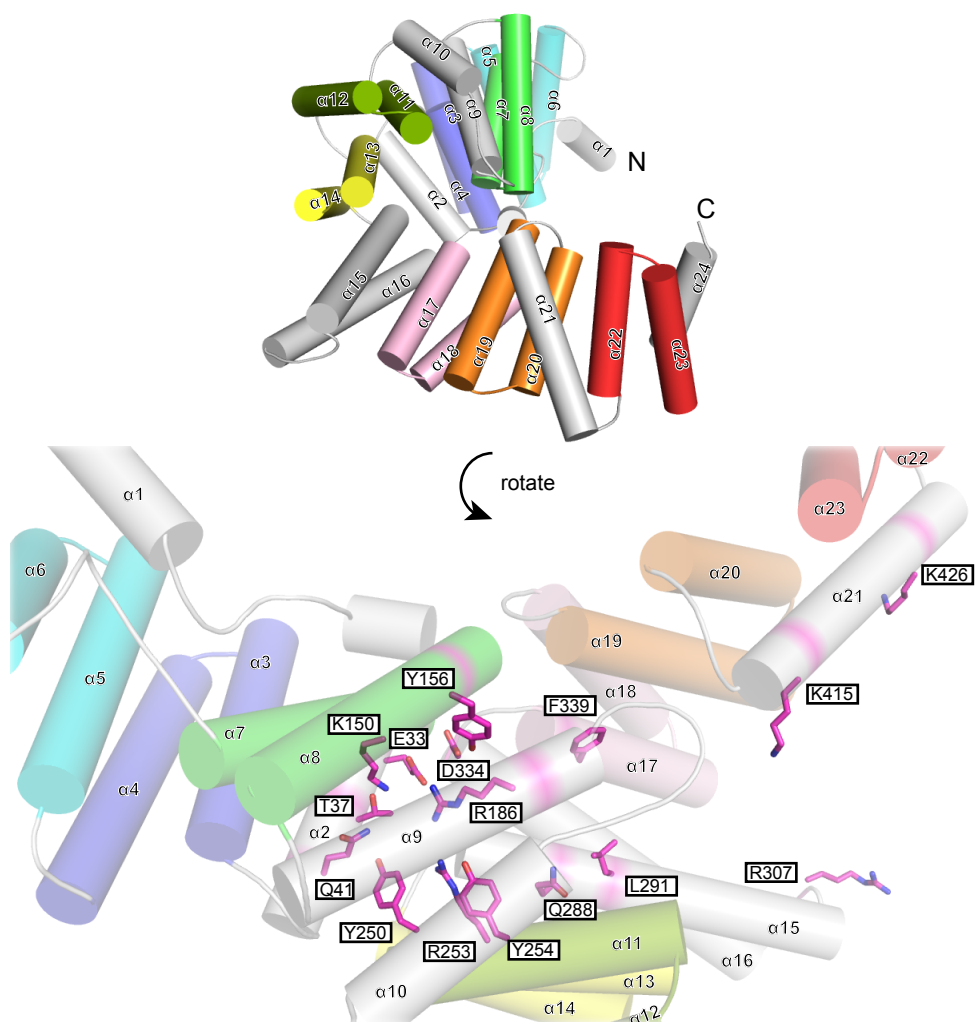**B**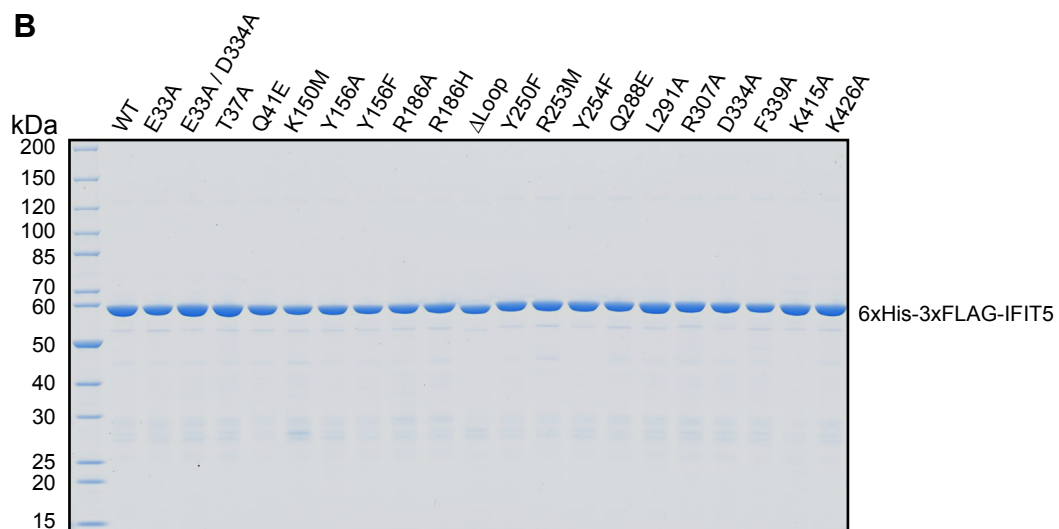

Supplement: 1412842111_pnas.1412842111.sfig02.pdf [file 1412842111_pnas.1412842111.sfig02.pdf]

**A**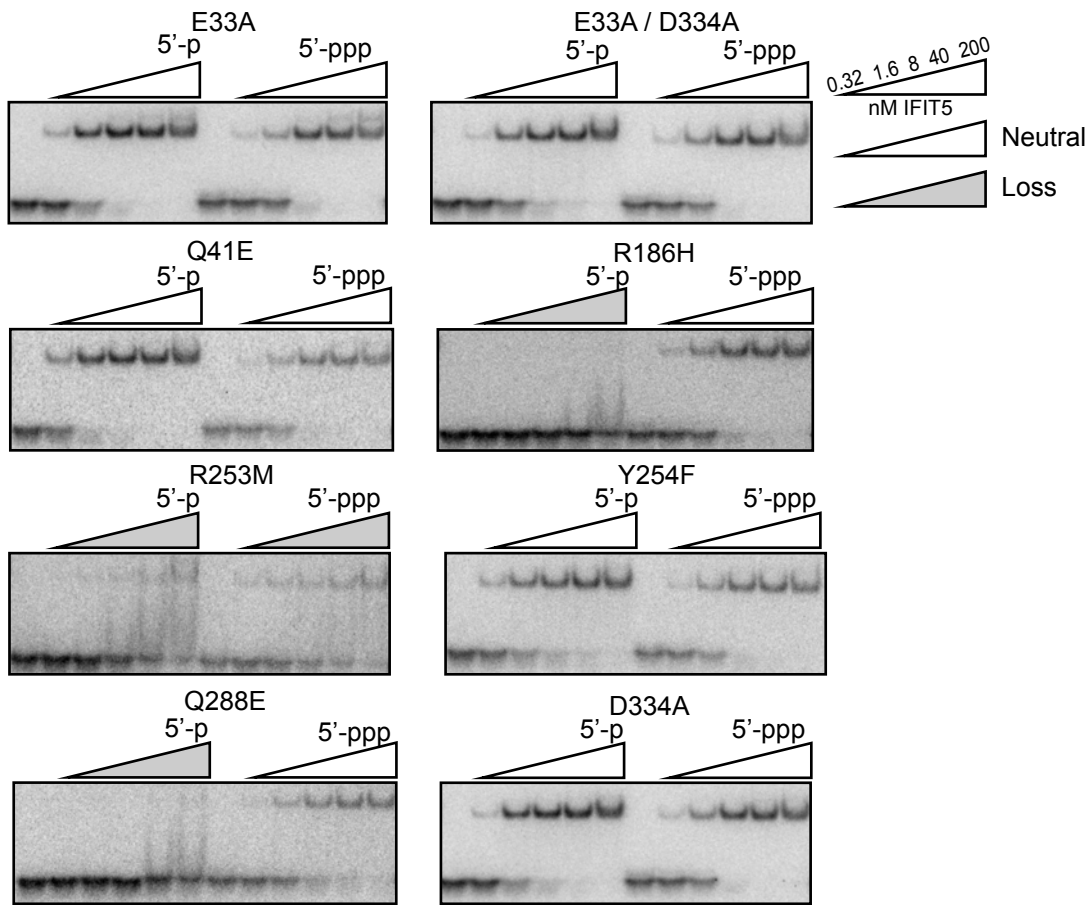**B**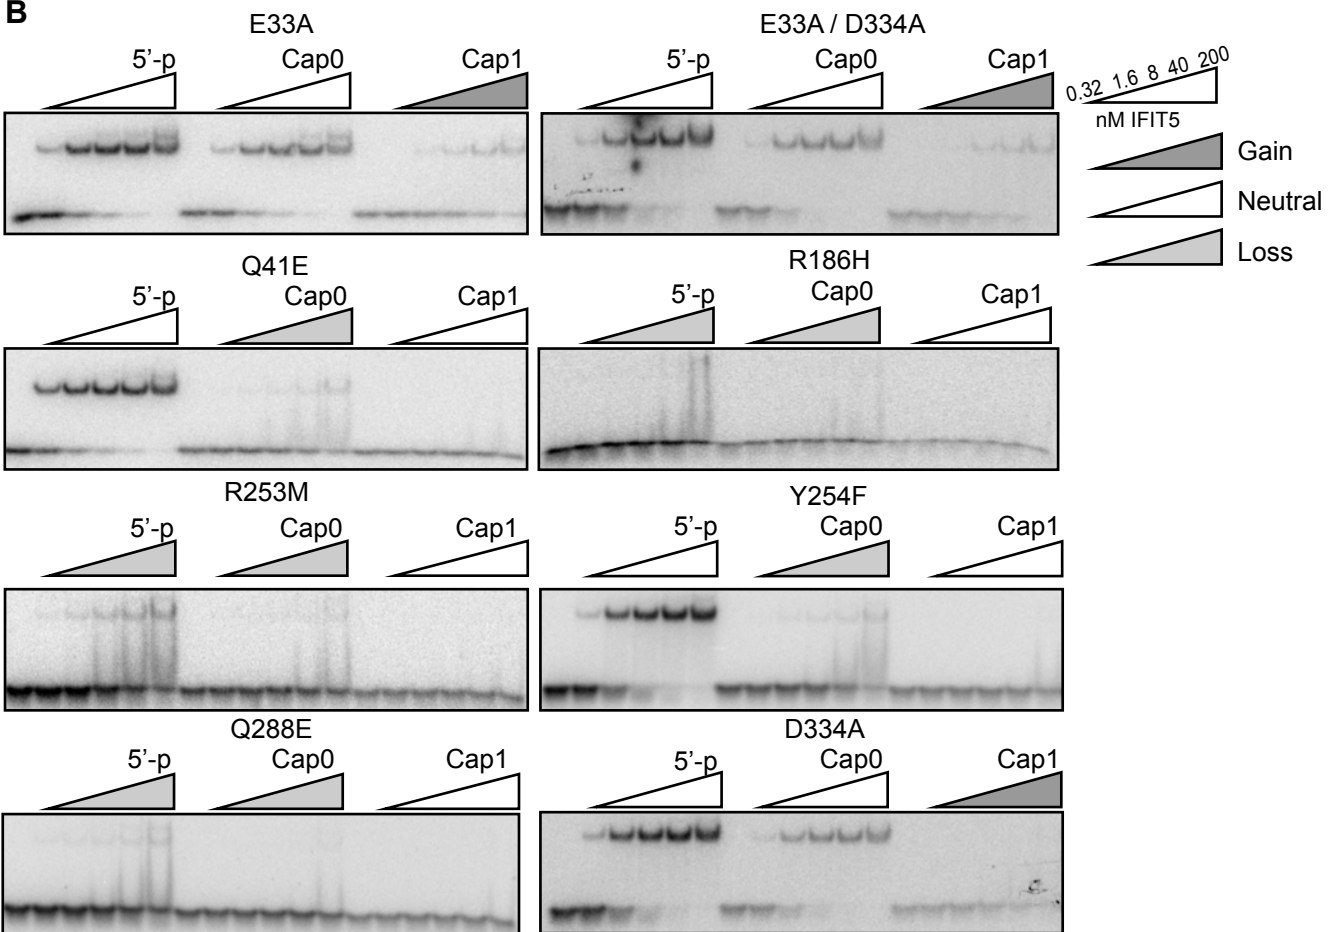

Supplement: 1412842111_pnas.1412842111.sfig03.pdf [file 1412842111_pnas.1412842111.sfig03.pdf]

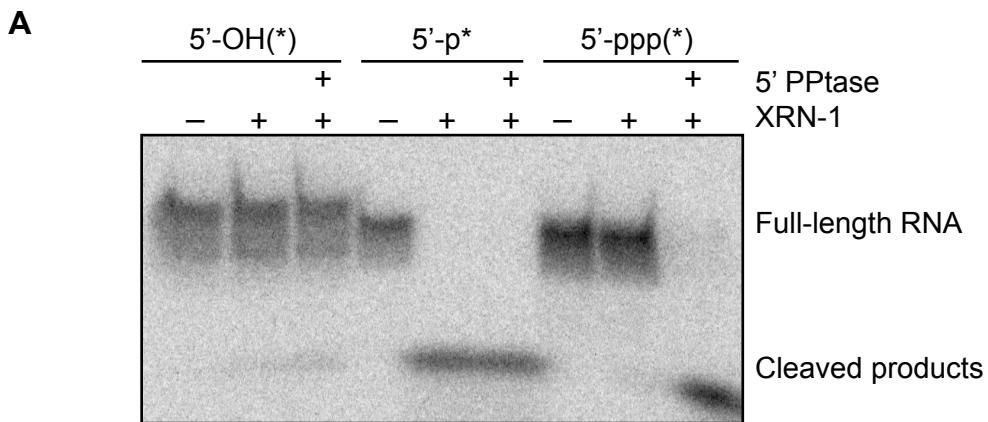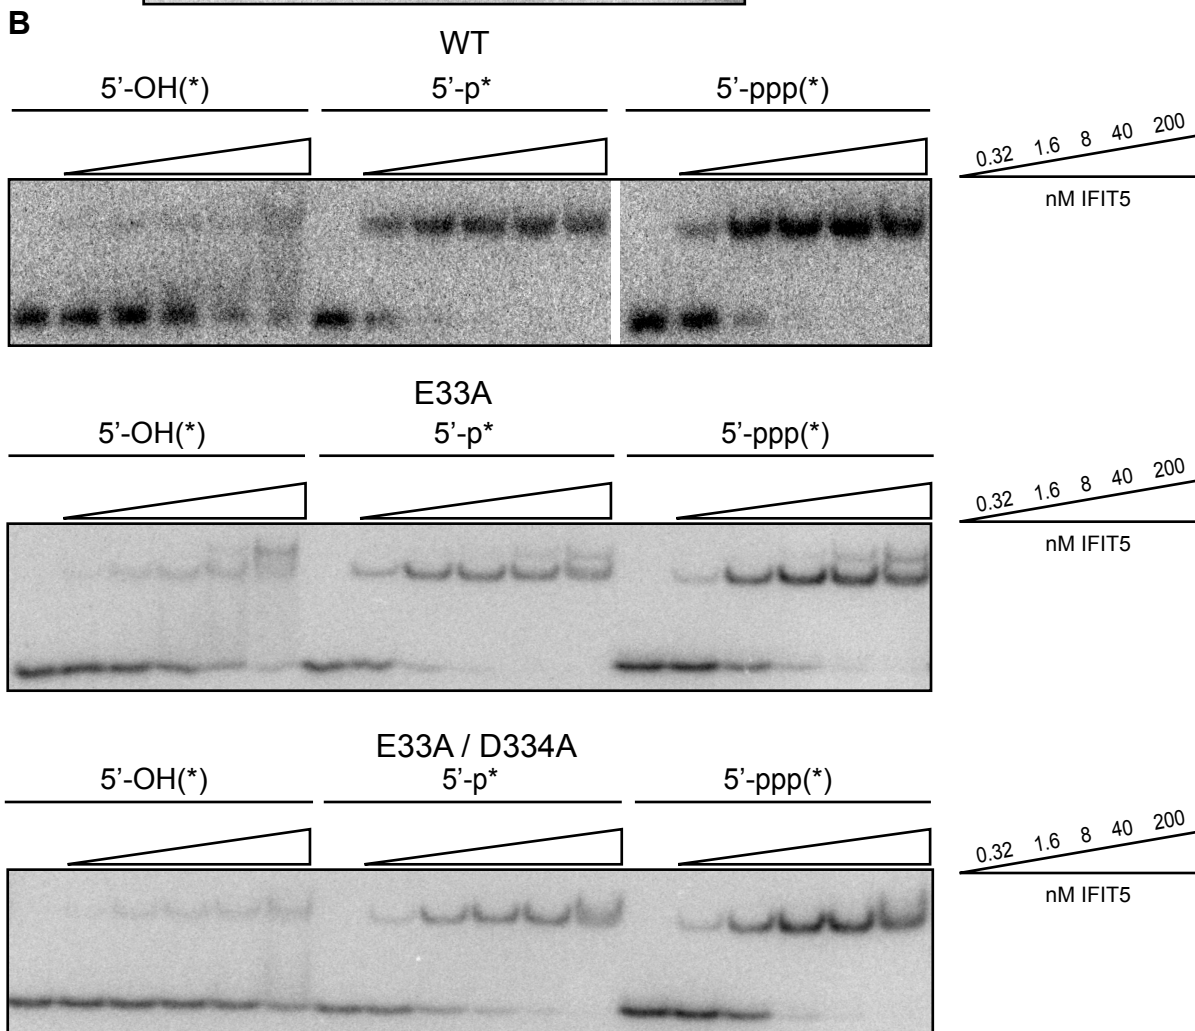

Supplement: 1412842111_pnas.1412842111.sfig04.pdf [file 1412842111_pnas.1412842111.sfig04.pdf]

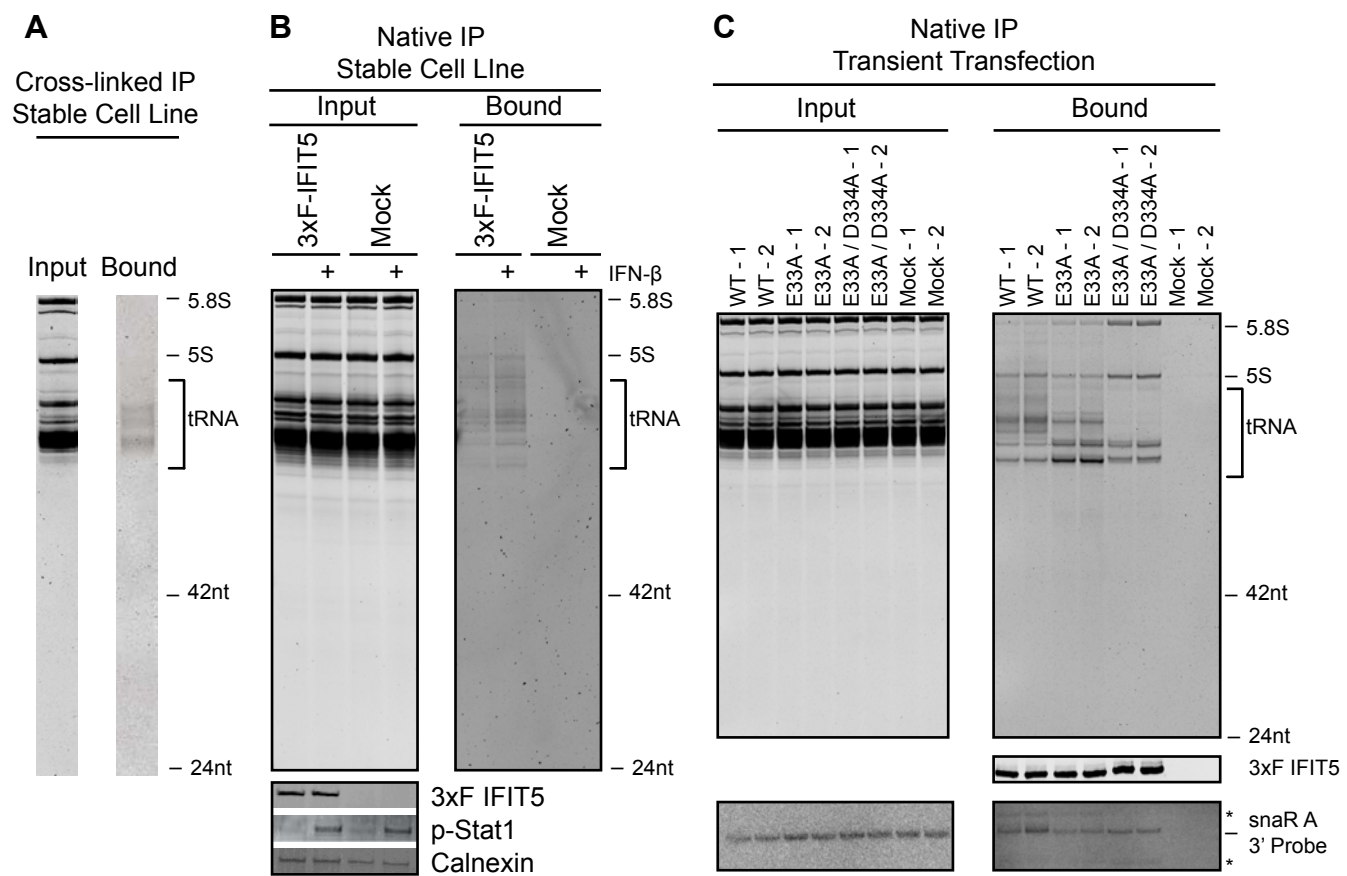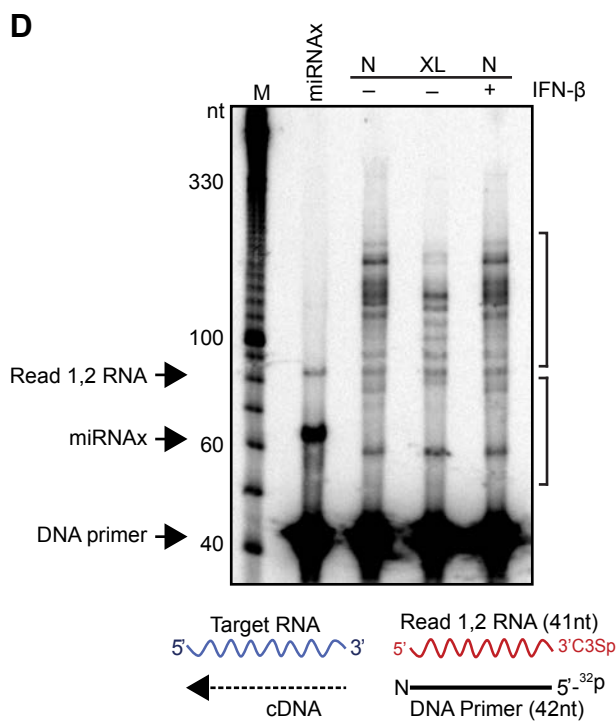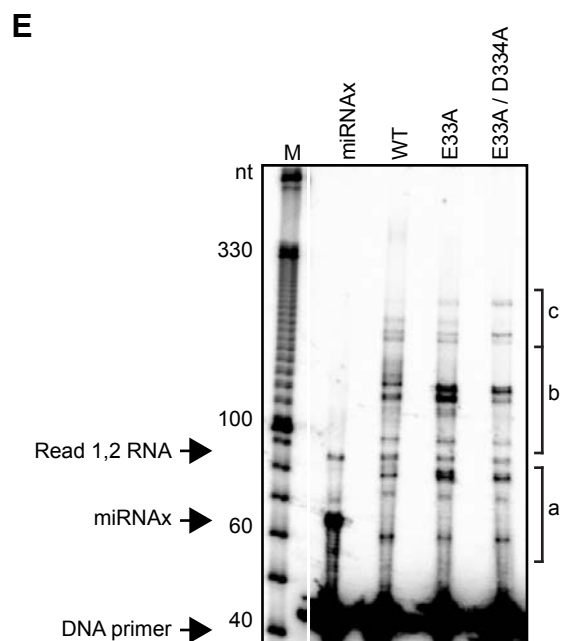

Supplement: 1412842111_pnas.1412842111.sfig05.pdf [file 1412842111_pnas.1412842111.sfig05.pdf]

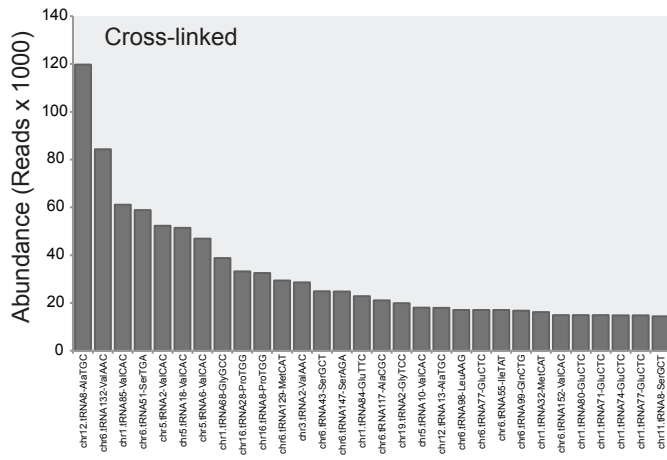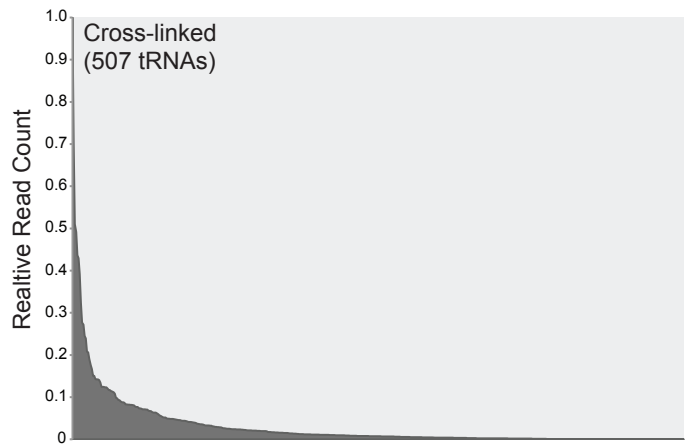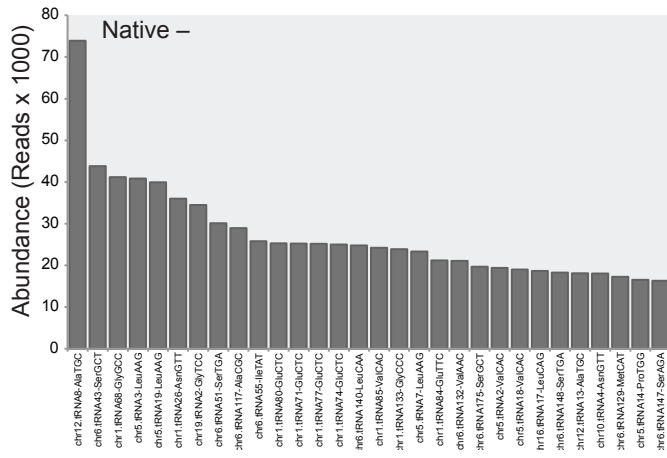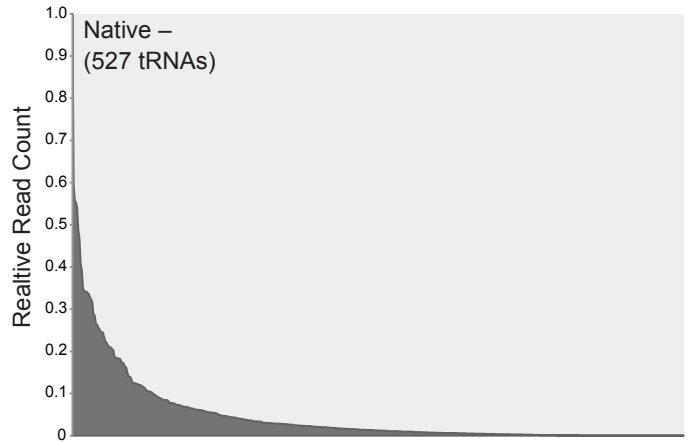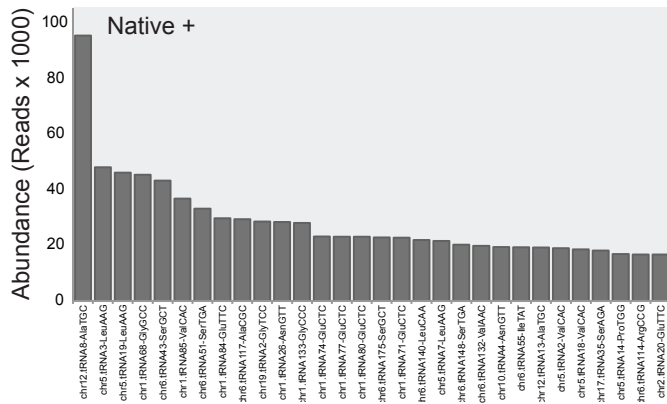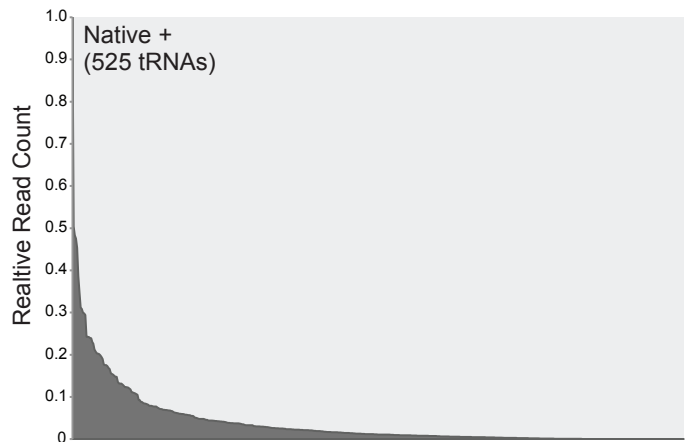

Supplement: 1412842111_pnas.1412842111.sfig06.pdf [file 1412842111_pnas.1412842111.sfig06.pdf]

**A** pcDNA3.1 3xF-IFIT5

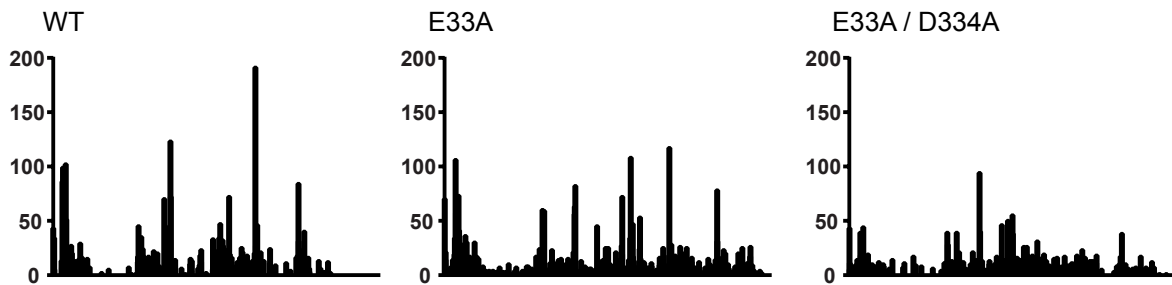

**B** HIST2H4A

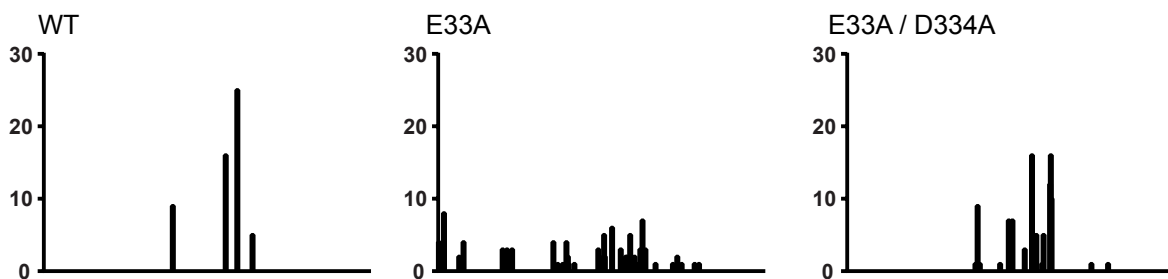

Supplement: 1412842111_pnas.1412842111.sfig10.pdf [file 1412842111_pnas.1412842111.sfig10.pdf]
